# Supplementary material for: Hydrogenation of silyl formates: sustainable production of silanol and methanol from hydrosilane and carbon dioxide
Source: Royal Society of Chemistry journal article supplement (doi:10.1039/c8cc02276c), 2018-01-01

## Supporting Information

# Hydrogenation of Silyl Formate: Sustainable Production of Silanol and Methanol from Silane and Carbon Dioxide

Jangwoo Koo, Seung Hyo Kim, and Soon Hyeok Hong\*

Department of Chemistry, College of Natural Sciences, Seoul National University, 1 Gwanak-ro, Seoul 08826, Republic of Korea

### Table of Contents

|                                                         |     |
|---------------------------------------------------------|-----|
| 1. General Experimental Details                         | S2  |
| 2. Turnover number (TON) test                           | S2  |
| 3. Stoichiometric Reaction to Investigate the Mechanism | S3  |
| 4. Synthesis of Silyl Formates                          | S4  |
| 5. GC-MS Spectra of Silyl Formates                      | S8  |
| 6. Hydrogenation of Silyl Formates                      | S17 |
| 7. Effect of Siloxane Impurity on the Reaction          | S19 |
| 8. References                                           | S20 |
| 9. NMR Spectra                                          | S21 |

## 1. General Experimental Details

Unless otherwise stated, all reactions were carried out using a stainless-steel autoclave or in an argon-filled glove box. All anhydrous solvents were purchased from Aldrich and used without further purification. NMR spectroscopy experiments were conducted with a Varian 400 and 500 MHz or a Bruker 300 MHz system. NMR spectra were processed with ACD NMR Processor or MestReNova. Chemical shifts are reported in ppm and referenced to residual solvent peaks ( $\text{CHCl}_3$  in  $\text{CDCl}_3$ : 7.26 ppm for  $^1\text{H}$ , 77.16 ppm for  $^{13}\text{C}$ ;  $\text{C}_6\text{H}_6$  in  $\text{C}_6\text{D}_6$ : 7.16 ppm for  $^1\text{H}$ , 128.06 ppm for  $^{13}\text{C}$ ;  $\text{CH}_3\text{CN}$  in  $\text{CD}_3\text{CN}$ : 1.94 ppm for  $^1\text{H}$ ). Coupling constants are reported in Hertz. GC analyses were carried out with a 7980A GC system from Agilent Technologies, equipped with a DB-624UI column and FID detector, using *p*-xylene as an internal standard. Analytical TLC was performed on a Merck 60 F254 silica gel plate (0.25mm thickness). Column chromatography was performed on Merck 60 silica gel (230–400 mesh). Silyl formates were prepared in accordance with a literature procedure.<sup>1-2</sup> All starting materials and reagents were purchased from Acros, Aldrich, Alfa Aesar, TCI, and Strem Chemical Inc., and used without further purification unless otherwise stated. High-resolution mass spectrometry (HRMS) analysis was performed at Korea Basic Science Institute Daegu Center using EI method.

## 2. Turnover Number (TON) Test

**Table S1.** Turnover number (TON) test with decreased loading of **3**.<sup>a</sup>

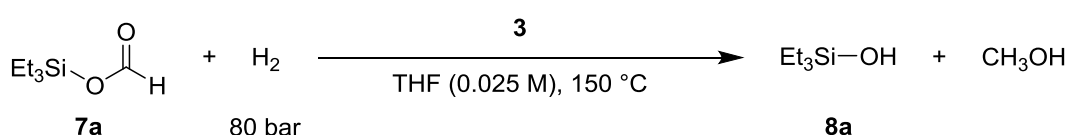

| entry | <b>3</b> (ppm) | Time (h) | yield <sup>b</sup> |                        | TON       |                        |
|-------|----------------|----------|--------------------|------------------------|-----------|------------------------|
|       |                |          | <b>8a</b>          | $\text{CH}_3\text{OH}$ | <b>8a</b> | $\text{CH}_3\text{OH}$ |
| 1     | 1000           | 12       | 92                 | 96                     | 920       | 960                    |
| 2     | 500            | 24       | 84                 | 95                     | 1680      | 1900                   |
| 3     | 500            | 48       | 99                 | 37                     | 1980      | 740                    |
| 4     | 500            | 72       | 47                 | 6                      | 940       | 120                    |
| 5     | 200            | 24       | 50                 | 18                     | 2500      | 900                    |
| 6     | 200            | 48       | 40                 | 12                     | 2000      | 600                    |

<sup>a</sup> Reaction conditions: **7a** (0.5 mmol, 1.0 equiv.), THF (20 mL), 150 °C,  $\text{H}_2$  (80 bar). <sup>b</sup> Yields were determined by GC analysis using *p*-xylene as an internal standard.

### 3. Stoichiometric Reaction to Investigate the Mechanism

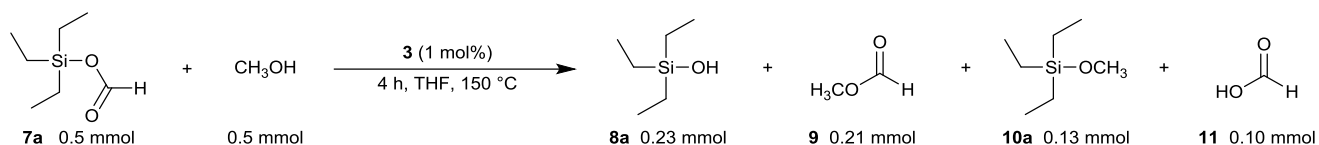

A 50 mL Schlenk flask containing a magnetic stirring bar was charged with **3** (1 mol%, 2.93 mg, 0.005 mmol) under Ar flow. Triethylsilyl formate **7a** (1.0 equiv, 0.5 mmol) was then added to the Schlenk flask as a solution in tetrahydrofuran (0.025 M, 20.0 mL), followed by the methanol (1.0 equiv, 0.5 mmol). The Schlenk flask was sealed, and heated to 150 °C for 4 h. Upon completion of the reaction, the mixture was cooled to 0 °C for 30 minutes. Triethyl silanol **8a**, methyl formate **9**, and triethylmethoxy silane **10a** were analyzed by GC using *p*-xylene (2.0 equiv, 123.3 μL, 1.0 mmol) as an internal standard. Formic acid **11** could not be detected by GC. Thus, qualitative and quantitative analyses of formic acid were performed by <sup>1</sup>H NMR using *p*-xylene (2.0 equiv, 123.3 μL, 1.0 mmol) as an internal standard.

**Table S2.** Quantitative analysis by GC

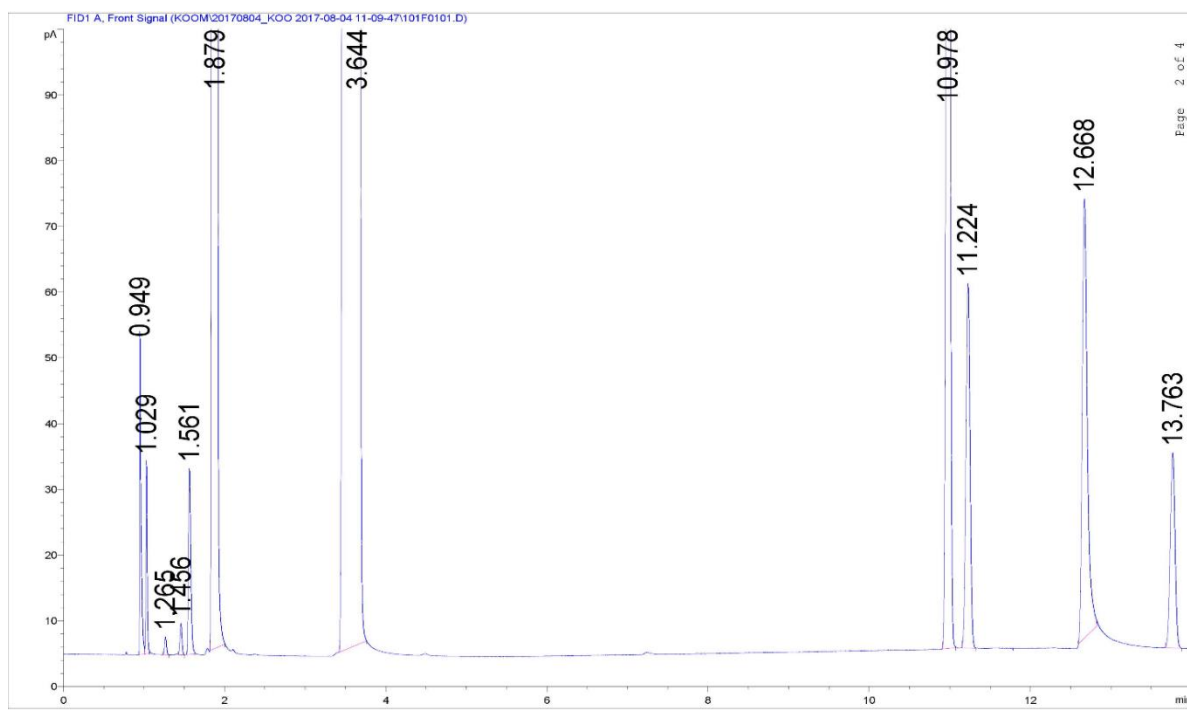

| retention time (min) | compound                          | area  | yield (mmol)        |
|----------------------|-----------------------------------|-------|---------------------|
| 1.029                | methyl formate <b>9</b>           | 37.5  | 0.210               |
| 10.978               | <i>p</i> -xylene                  | 936.4 | (internal standard) |
| 11.224               | triethylmethoxy silane <b>10a</b> | 195.6 | 0.126               |
| 12.668               | triethyl silanol <b>8a</b>        | 294.4 | 0.231               |

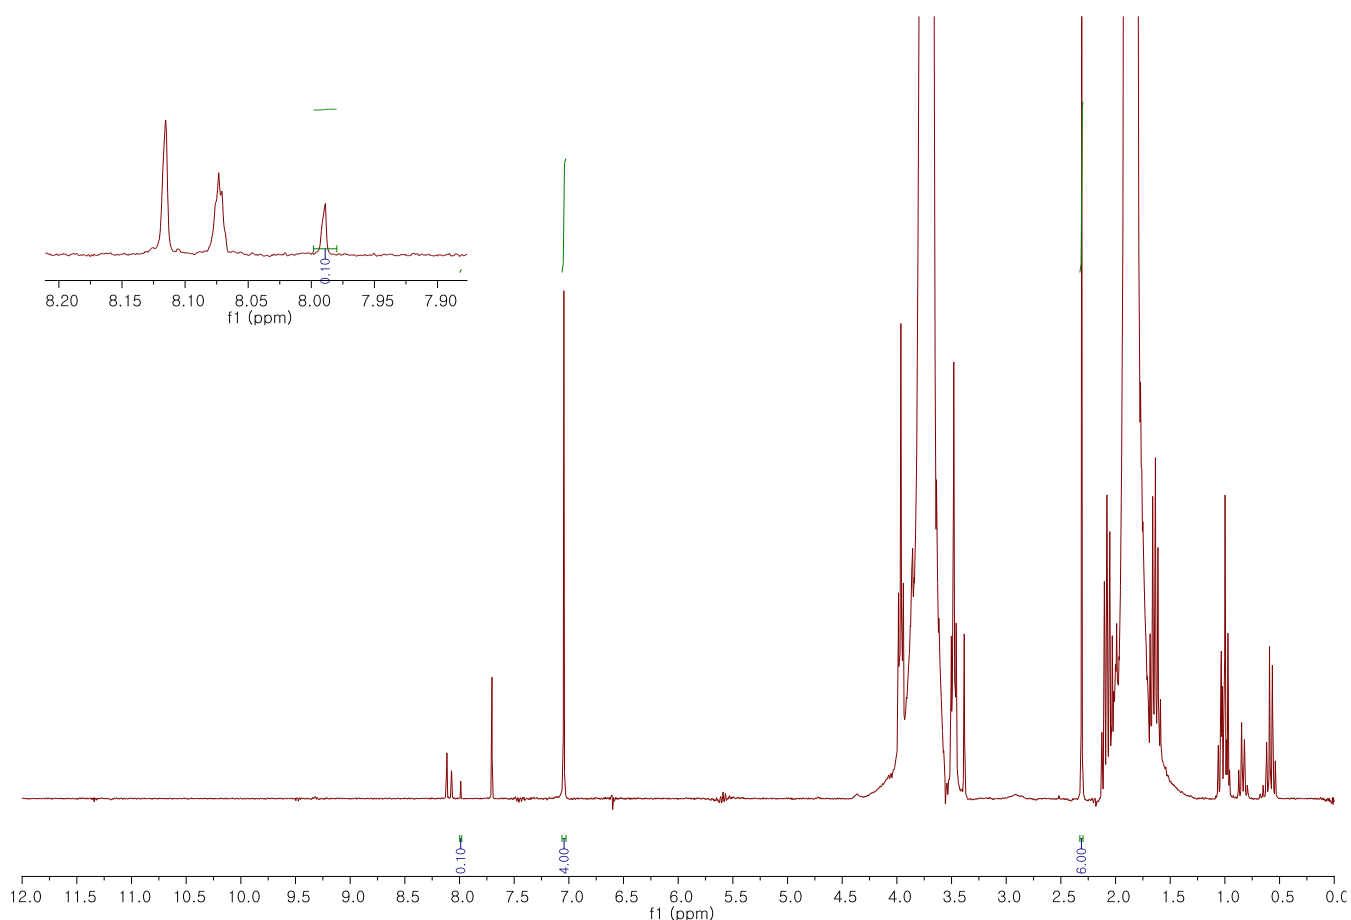

**Figure S1.** Formic acid **11** analysis by  $^1\text{H}$  NMR

#### 4. Synthesis of Silyl Formates

##### General Procedure A: **7a**, **7c–7f**, **7h** and **7i**

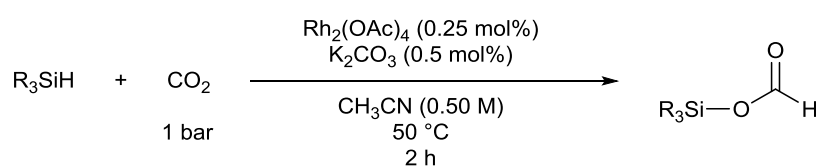

**Scheme S1**

The silyl formates were prepared according to a literature procedure.<sup>1</sup>  $\text{K}_2\text{CO}_3$  was dried at  $120^\circ\text{C}$  in an oven overnight. Inside a glove box, a 50 mL Schlenk flask containing a magnetic stirring bar was charged with  $\text{K}_2\text{CO}_3$  (0.5 mol%, 3.5 mg, 0.025 mmol) and  $\text{Rh}_2(\text{OAc})_4$  (0.25 mol%, 5.5 mg, 0.0125 mmol). Hydrosilane (5.0 mmol) was then added to the Schlenk flask as a solution in acetonitrile (0.50 M, 10.0 mL). The Schlenk flask was sealed, replaced with 1 bar of  $\text{CO}_2$ , and heated to  $50^\circ\text{C}$  for 2 h. Upon completion of the reaction, the mixture was cooled to room temperature. The solution was filtered by syringe filter, and the solvent was removed using a rotary evaporator. The product was purified by vacuum distillation. The purity of the product was determined by  $^1\text{H}$  NMR analysis. Silyl formates need

to be purified by vacuum distillation,<sup>3-5</sup> due to rapid hydrolysis by water in air.<sup>6</sup> The observed impurity was only siloxane (checked by GC-MS and <sup>1</sup>H NMR). The purity of the reported compounds could not be improved even with multiple times (five or more) of vacuum distillations.

#### General Procedure B: **7b** and **7g**

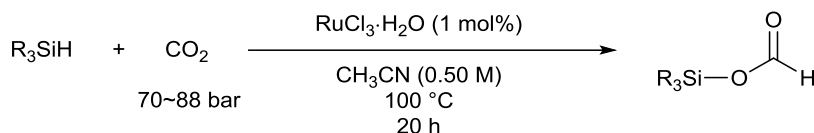

**Scheme S2**

The silyl formates were prepared according to a literature procedure.<sup>2</sup> Inside a glove box, a 67 mL stainless-steel autoclave containing a magnetic stirring bar was charged with RuCl<sub>3</sub>·H<sub>2</sub>O (1 mol%, 10.4 mg, 0.05 mmol). Hydrosilane (5.0 mmol) was then added to the reactor as a solution in acetonitrile (0.50 M, 10.0 mL). The reactor was sealed, pressurized with 70~88 bar of CO<sub>2</sub>, and heated to 100 °C for 20 h. Upon completion of the reaction, the mixture was cooled to room temperature. Unreacted CO<sub>2</sub> was carefully released in a fume hood. The solution was filtered by a syringe filter, and all the solvent was removed using a rotary evaporator. The product was purified by vacuum distillation. The purity of the product was determined by <sup>1</sup>H NMR analysis. Silyl formates need to be purified by vacuum distillation,<sup>3-5</sup> due to rapid hydrolysis by water in air.<sup>6</sup> The observed impurity was only siloxane (checked by GC-MS and <sup>1</sup>H NMR). The purity of the reported compounds could not be improved even with multiple times (five or more) of vacuum distillations.

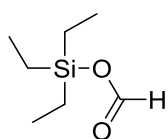

#### **Triethylsilyl formate (7a)**

Colorless liquid (99% purity was calculated by <sup>1</sup>H NMR). Reaction was conducted at 70 °C for 12 h. <sup>1</sup>H NMR (300 MHz, C<sub>6</sub>D<sub>6</sub>) δ = 7.74 (s, 1H), 0.91 (t, *J*=7.8, 9H), 0.68 (q, *J*=7.8, 6H). The identity of the compound was confirmed by comparison with reported data.<sup>7</sup>

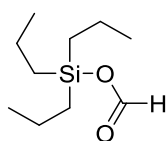

#### **Tri-n-propylsilyl formate (7b)**

Redish brown liquid (90% purity was calculated by  $^1\text{H}$  NMR).  $^1\text{H}$  NMR (300 MHz,  $\text{C}_6\text{D}_6$ )  $\delta$  = 7.77 (s, 1H), 1.35 (dq,  $J=15.2, 7.7, 6\text{H}$ ), 0.93 (t,  $J=7.2, 9\text{H}$ ), 0.72 (t, 6H).  $^{13}\text{C}$  NMR (75 MHz,  $\text{C}_6\text{D}_6$ )  $\delta$  = 160.41, 18.28, 16.80, 16.47. HRMS (EI):  $m/z$   $[\text{M}]^+$  calcd for  $\text{C}_{10}\text{H}_{22}\text{O}_2\text{Si}$ : 202.1384, found: 202.1386.

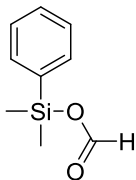

#### Dimethylphenylsilyl formate (7c)

Colorless liquid (94% purity was calculated by  $^1\text{H}$  NMR).  $^1\text{H}$  NMR (300 MHz,  $\text{C}_6\text{D}_6$ )  $\delta$  = 7.71 (s, 1H), 7.52 – 7.54 (m, 2H), 7.20 – 7.18 (m, 3H), 0.43 (s, 6H). The identity of the compound was confirmed by comparison with reported data.<sup>7</sup>

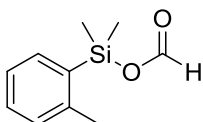

#### Dimethyl(2-methylphenyl)silyl formate (7d)

Colorless liquid (90% purity was calculated by  $^1\text{H}$  NMR).  $^1\text{H}$  NMR (300 MHz,  $\text{C}_6\text{D}_6$ )  $\delta$  = 7.72 (s, 1H), 7.50 (dd,  $J=7.3, 1.5, 1\text{H}$ ), 7.13 (d,  $J=1.6, 1\text{H}$ ), 7.06 (td,  $J=7.4, 0.7, 1\text{H}$ ), 7.00 – 6.97 (m, 1H), 2.26 (s, 3H), 0.46 (s, 6H).  $^{13}\text{C}$  NMR (75 MHz,  $\text{C}_6\text{D}_6$ )  $\delta$  = 160.21, 143.41, 134.68, 134.02, 130.74, 130.38, 125.48, 22.74, -0.33. HRMS (EI):  $m/z$   $[\text{M}]^+$  calcd for  $\text{C}_{10}\text{H}_{14}\text{O}_2\text{Si}$ : 194.0758, found: 194.0760.

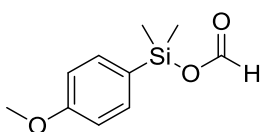

#### Dimethyl(4-methoxyphenyl)silyl formate (7e)

Yellow liquid (90% purity was calculated by  $^1\text{H}$  NMR).  $^1\text{H}$  NMR (300 MHz,  $\text{CD}_3\text{CN}$ )  $\delta$  = 8.10 (s, 1H), 7.61 – 7.56 (m, 2H), 7.00 – 6.96 (m, 2H), 3.81 (s, 3H), 0.54 (s, 6H). The identity of the compound was confirmed by comparison with reported data.<sup>1</sup>

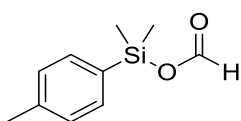

#### Dimethyl(4-methylphenyl)silyl formate (7f)

Colorless liquid (90% purity was calculated by  $^1\text{H}$  NMR).  $^1\text{H}$  NMR (300 MHz,  $\text{C}_6\text{D}_6$ )  $\delta$  = 7.71 (s, 1H), 7.51 (d,  $J=7.9$ , 2H), 7.04 (d,  $J=7.5$ , 2H), 2.09 (s, 3H), 0.45 (s, 6H).  $^{13}\text{C}$  NMR (75 MHz,  $\text{C}_6\text{D}_6$ )  $\delta$  = 160.48, 140.42, 134.06, 131.86, 129.09, 21.49, -1.53. HRMS (EI):  $m/z$   $[\text{M}]^+$  calcd for  $\text{C}_{10}\text{H}_{14}\text{O}_2\text{Si}$ : 194.0758, found: 194.0765.

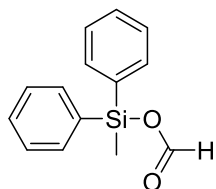

#### Diphenylmethylsilyl formate (7g)

Yellow liquid (94% purity was calculated by  $^1\text{H}$  NMR).  $^1\text{H}$  NMR (300 MHz,  $\text{CD}_3\text{CN}$ )  $\delta$  = 8.22 (s, 1H), 7.66 – 7.63 (m, 4H), 7.49 – 7.40 (m, 6H), 0.87 (s, 3H). The identity of the compound was confirmed by comparison with reported data.<sup>1</sup>

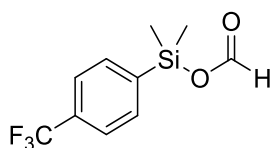

#### Dimethyl(4-trifluoromethylphenyl)silyl formate (7h)

Colorless liquid (86% purity was calculated by  $^1\text{H}$  NMR).  $^1\text{H}$  NMR (300 MHz,  $\text{CD}_3\text{CN}$ )  $\delta$  = 8.12 (s, 1H), 7.85 (d,  $J=8.2$ , 2H), 7.73 (d,  $J=8.1$ , 2H), 0.60 (s, 6H). The identity of the compound was confirmed by comparison with reported data.<sup>1</sup>

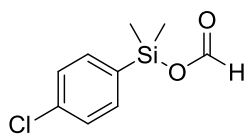

#### Dimethyl(4-chlorophenyl)silyl formate (7i)

Yellow liquid (86% purity was calculated by  $^1\text{H}$  NMR).  $^1\text{H}$  NMR (300 MHz,  $\text{CD}_3\text{CN}$ )  $\delta$  = 8.10 (s, 1H), 7.66 – 7.62 (m, 2H), 7.46 – 7.42 (m, 2H), 0.56 (s, 6H). The identity of the compound was confirmed by comparison with reported data.<sup>1</sup>

## 5. GC-MS Spectra of Silyl Formates

File : C:\MSDCHEM\1\DATA\SHHONG\KOO\180409\JKET3.D  
Operator : KOO  
Acquired : 9 Apr 2018 17:35 using AcqMethod DRY\_MS  
Instrument : Instrumen  
Sample Name: JKET3  
Misc Info :  
Vial Number: 22

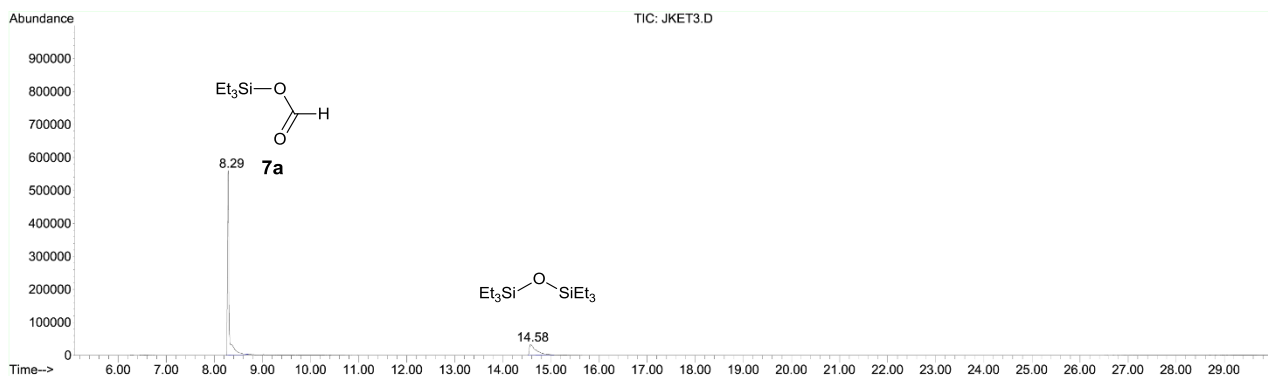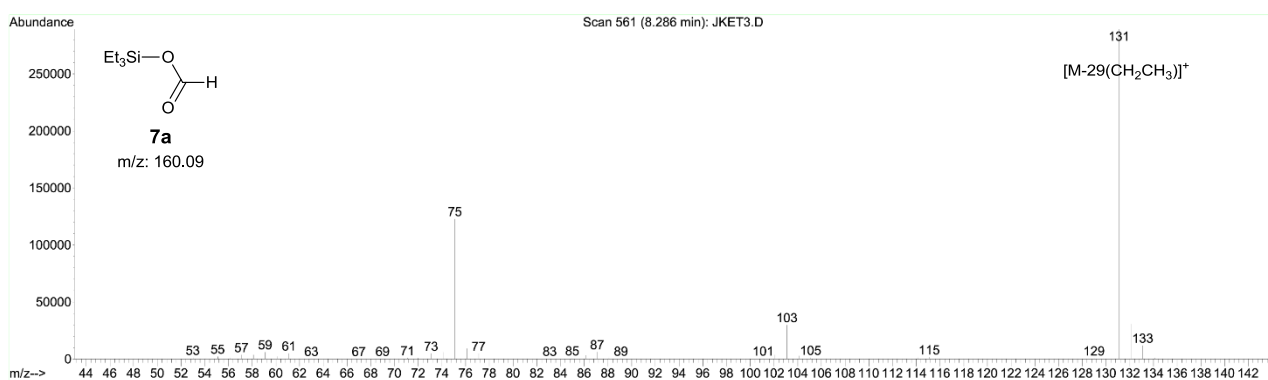

File : C:\MSDCHEM\1\DATA\SHHONG\KOO\180409\JKET3.D  
Operator : KOO  
Acquired : 9 Apr 2018 17:35 using AcqMethod DRY\_MS  
Instrument : Instrumen  
Sample Name: JKET3  
Misc Info :  
Vial Number: 22

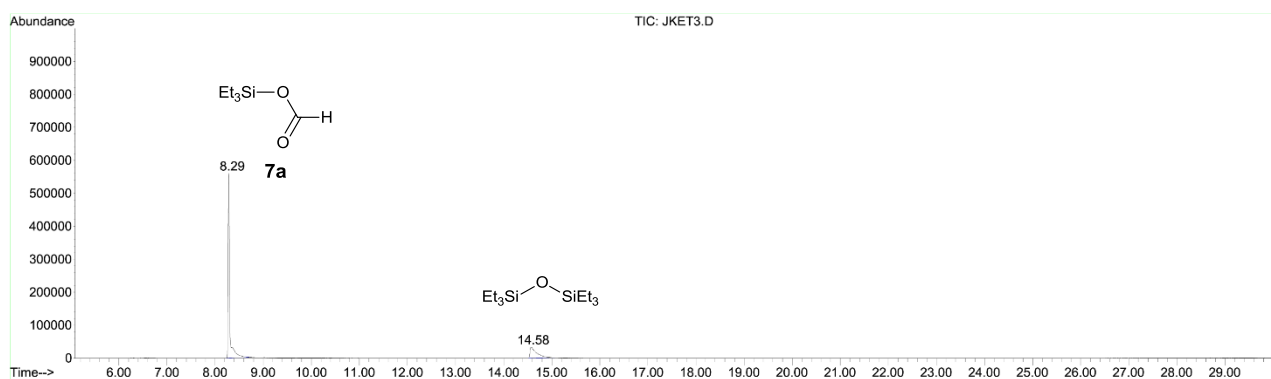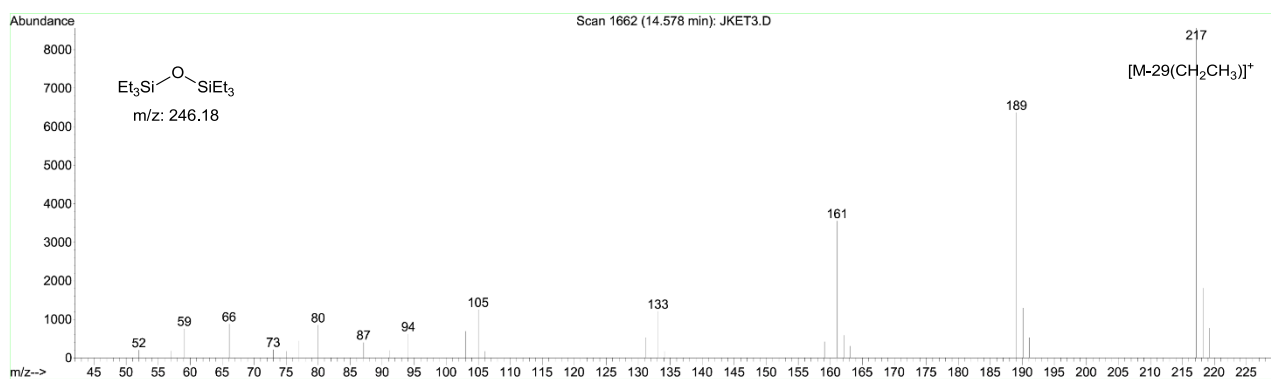



File : C:\MSDCHEM\1\DATA\SHHONG\KOO\180409\JKPR3.D  
 Operator : KOO  
 Acquired : 10 Apr 2018 11:21 using AcqMethod DRY\_MS  
 Instrument : Instrumen  
 Sample Name: JKPR3  
 Misc Info :  
 Vial Number: 23

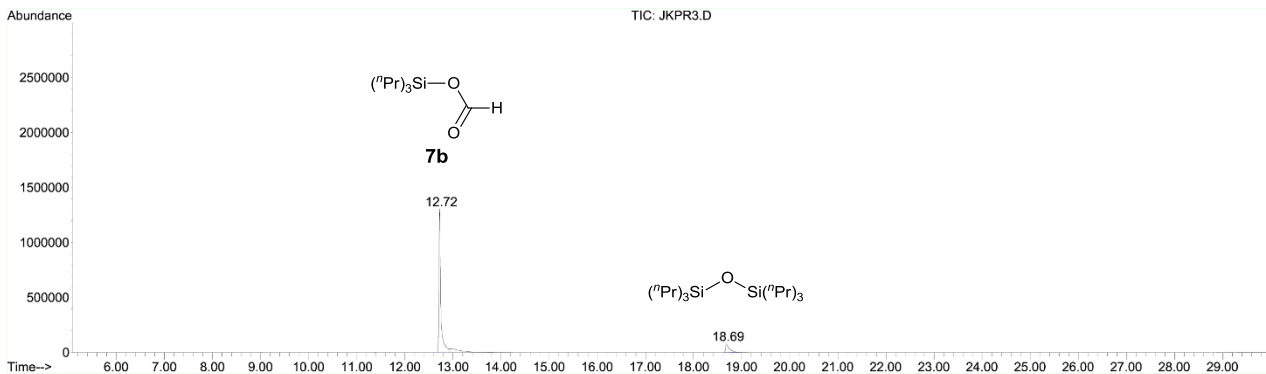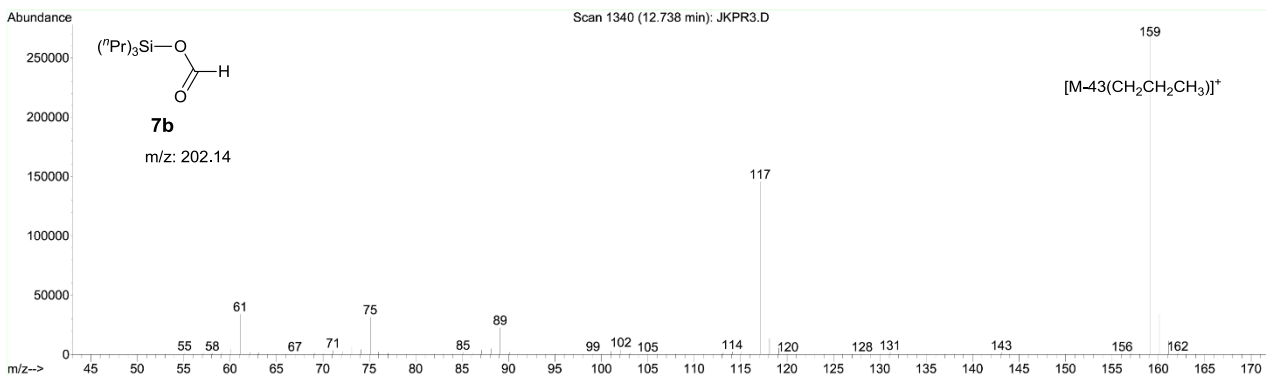

File : C:\MSDCHEM\1\DATA\SHHONG\KOO\180409\JKPR3.D  
 Operator : KOO  
 Acquired : 10 Apr 2018 11:21 using AcqMethod DRY\_MS  
 Instrument : Instrumen  
 Sample Name: JKPR3  
 Misc Info :  
 Vial Number: 23

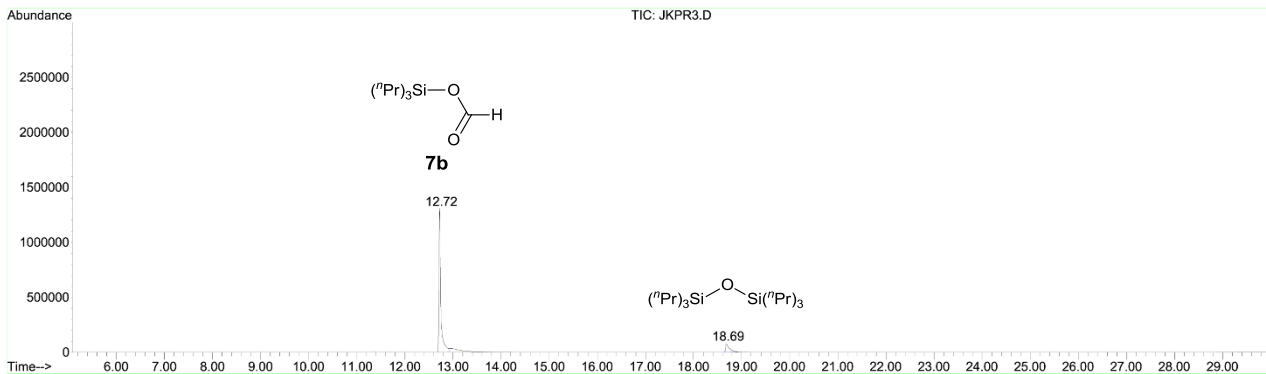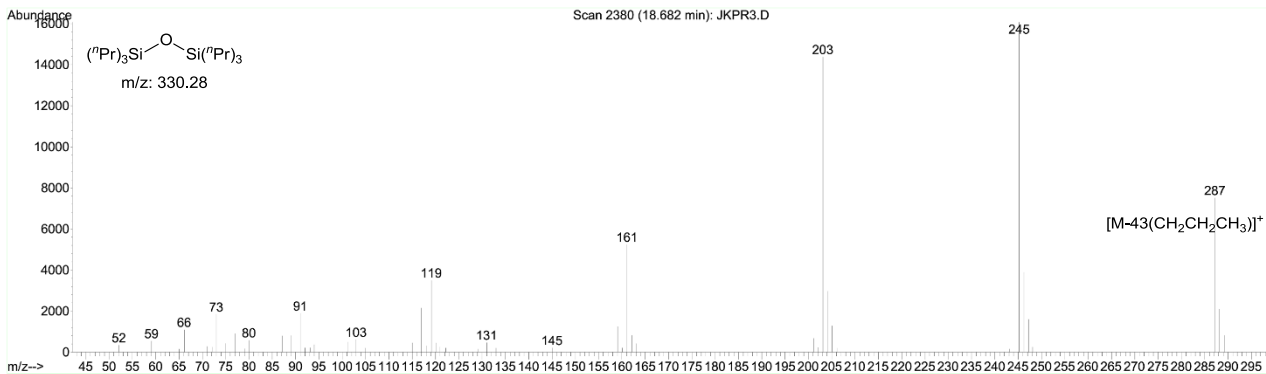

File : C:\MSDCHEM\1\DATA\SHHONG\KOO\180409\JKPHME2.D  
 Operator : KOO  
 Acquired : 9 Apr 2018 18:20 using AcqMethod DRY\_MS  
 Instrument : Instrumen  
 Sample Name: JKPHME2  
 Misc Info :  
 Vial Number: 23

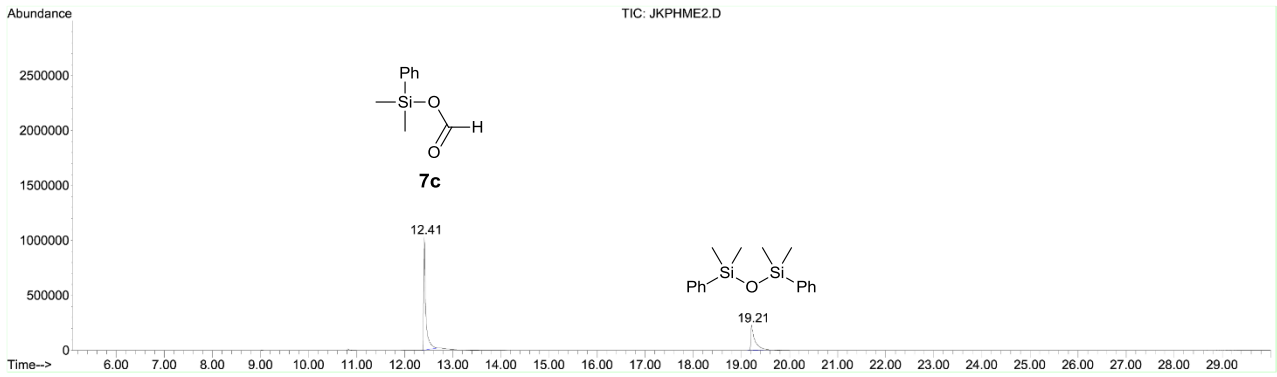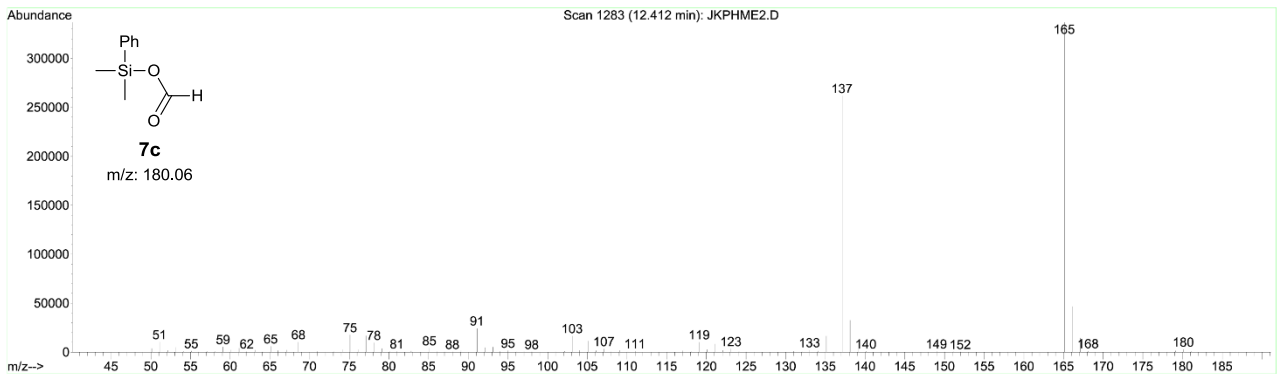

File : C:\MSDCHEM\1\DATA\SHHONG\KOO\180409\JKPHME2.D  
 Operator : KOO  
 Acquired : 9 Apr 2018 18:20 using AcqMethod DRY\_MS  
 Instrument : Instrumen  
 Sample Name: JKPHME2  
 Misc Info :  
 Vial Number: 23

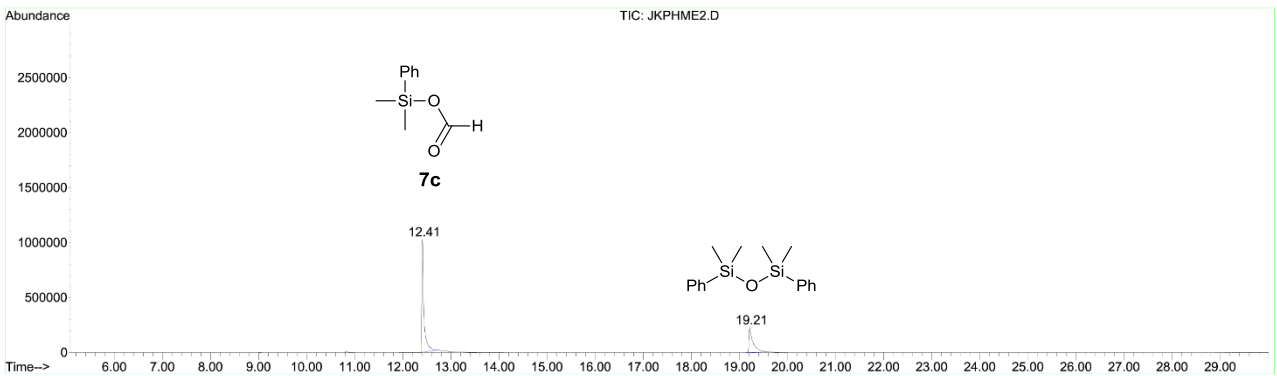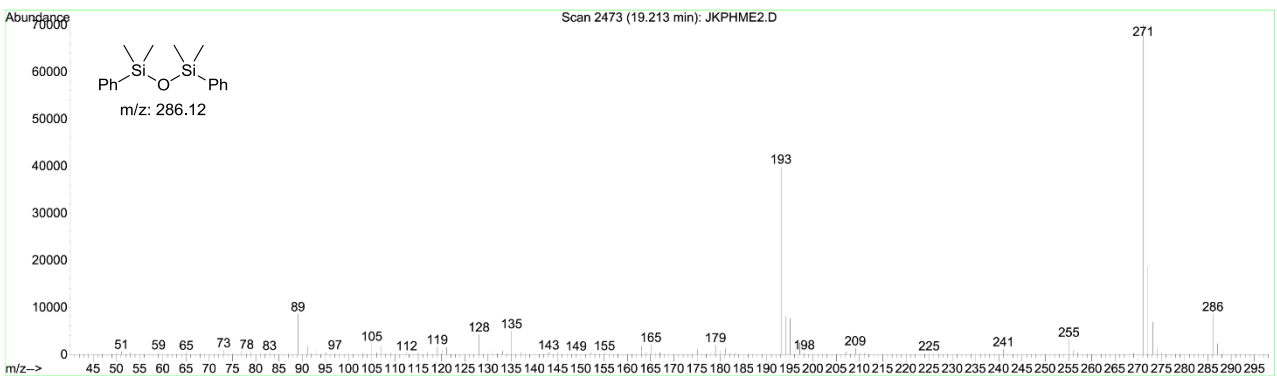

File : C:\MSDCHEM\1\DATA\SHHONG\KOO\180409\JKOMP.D  
 Operator : KOO  
 Acquired : 10 Apr 2018 9:49 using AcqMethod DRY\_MS  
 Instrument : Instrumen  
 Sample Name: JKOMP  
 Misc Info :  
 Vial Number: 21

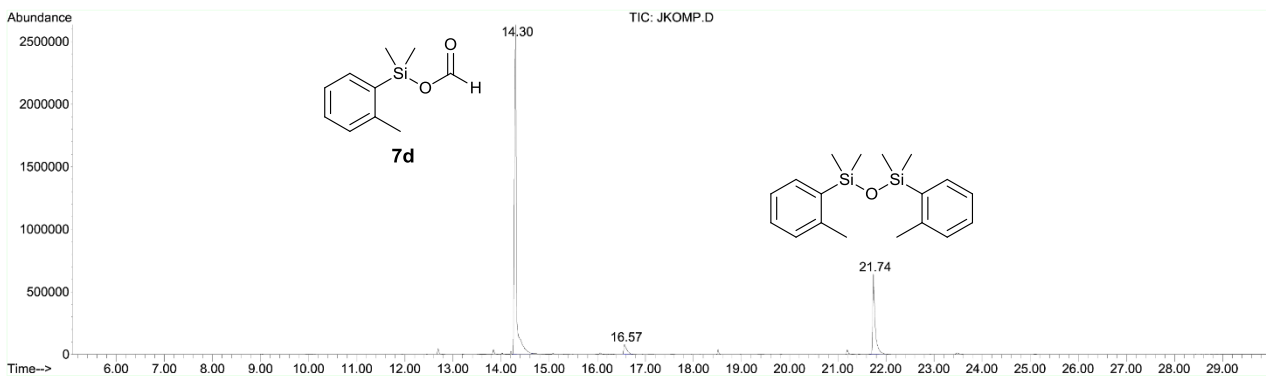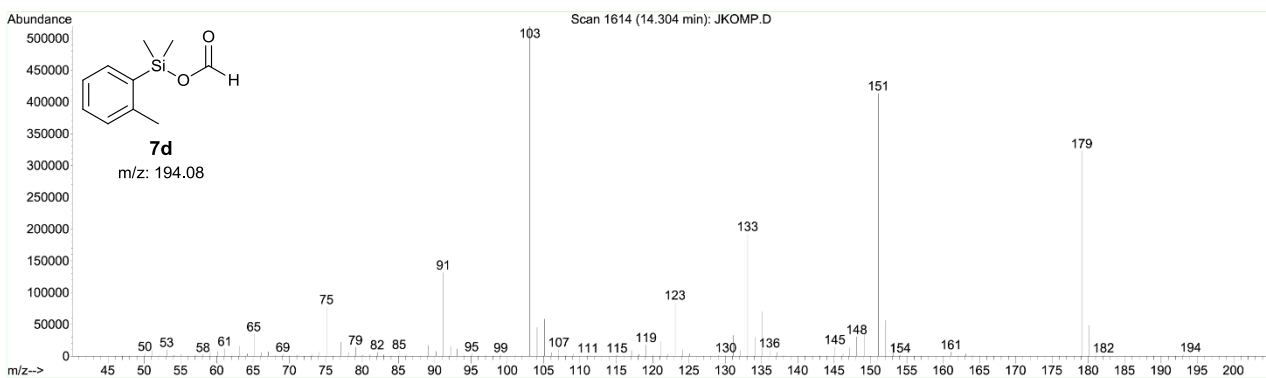

File : C:\MSDCHEM\1\DATA\SHHONG\KOO\180409\JKOMP.D  
 Operator : KOO  
 Acquired : 10 Apr 2018 9:49 using AcqMethod DRY\_MS  
 Instrument : Instrumen  
 Sample Name: JKOMP  
 Misc Info :  
 Vial Number: 21

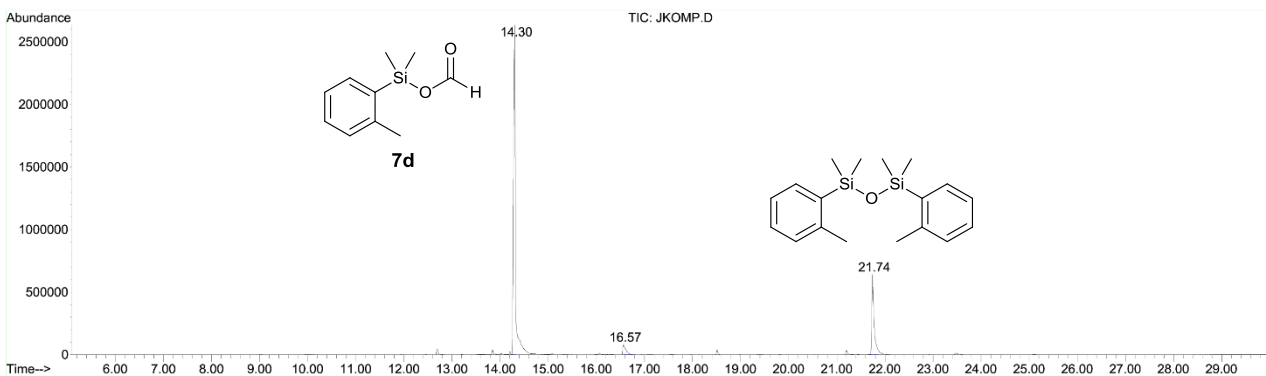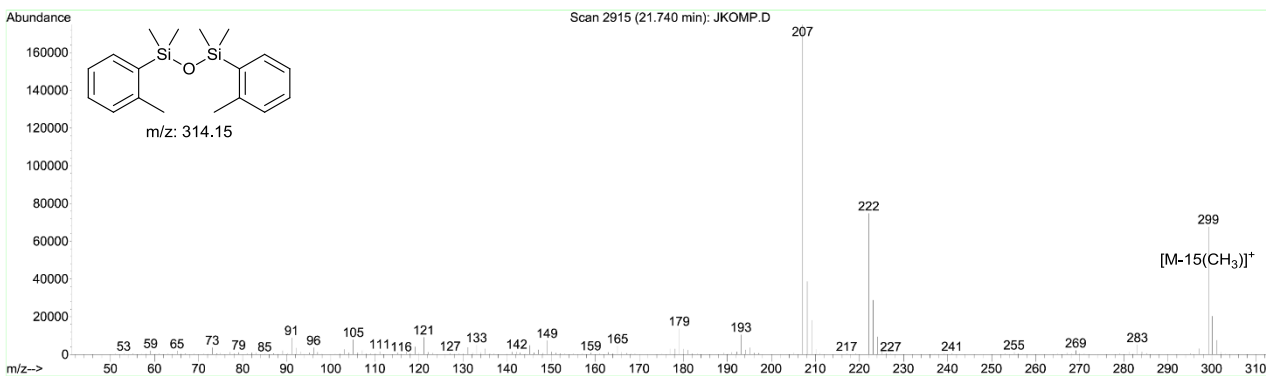

File : C:\MSDCHEM\1\DATA\SHHONG\KOO\180409\JKMEO.D  
 Operator : KOO  
 Acquired : 11 Apr 2018 19:48 using AcqMethod DRY\_MS  
 Instrument : Instrumen  
 Sample Name: JKMeo  
 Misc Info :  
 Vial Number: 23

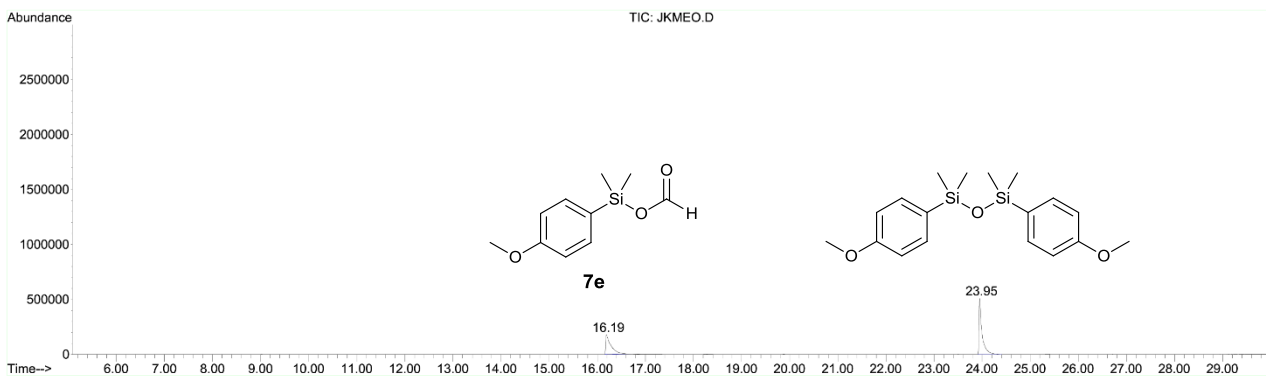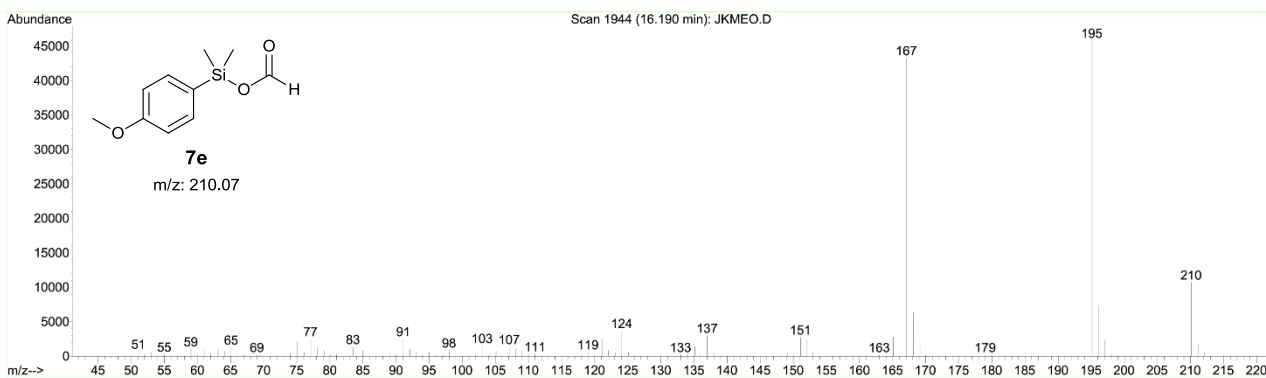

File : C:\MSDCHEM\1\DATA\SHHONG\KOO\180409\JKMEO.D  
 Operator : KOO  
 Acquired : 11 Apr 2018 19:48 using AcqMethod DRY\_MS  
 Instrument : Instrumen  
 Sample Name: JKMeo  
 Misc Info :  
 Vial Number: 23

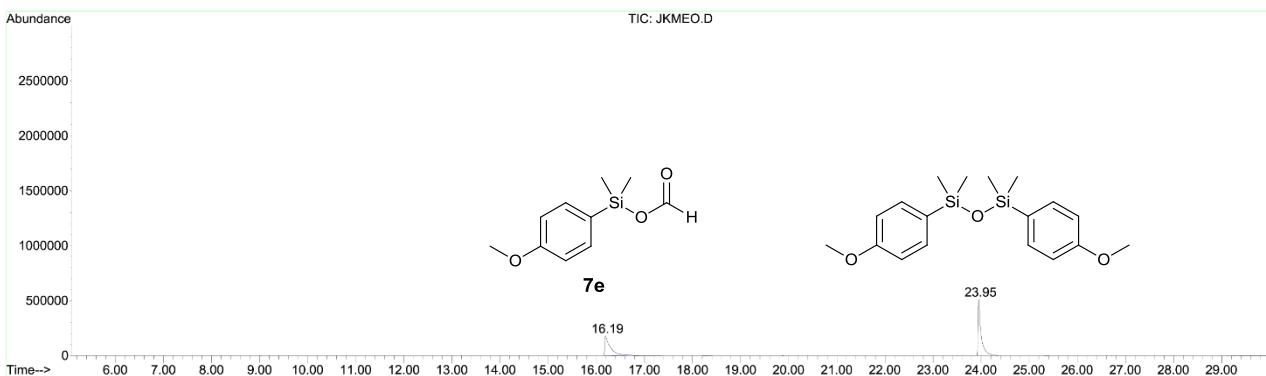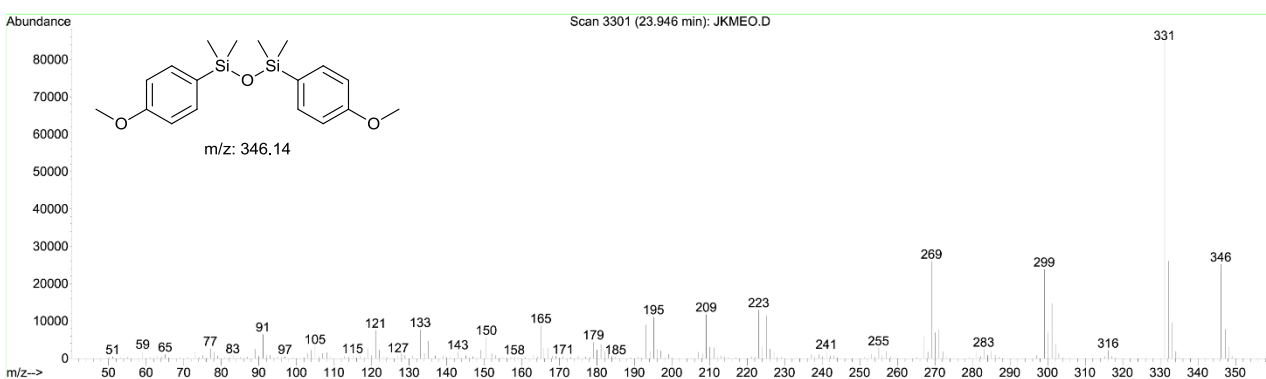

File : C:\MSDCHEM\1\DATA\SHHONG\KOO\180409\JKME.D  
 Operator : KOO  
 Acquired : 10 Apr 2018 10:35 using AcqMethod DRY\_MS  
 Instrument : Instrumen  
 Sample Name: JKME  
 Misc Info :  
 Vial Number: 22

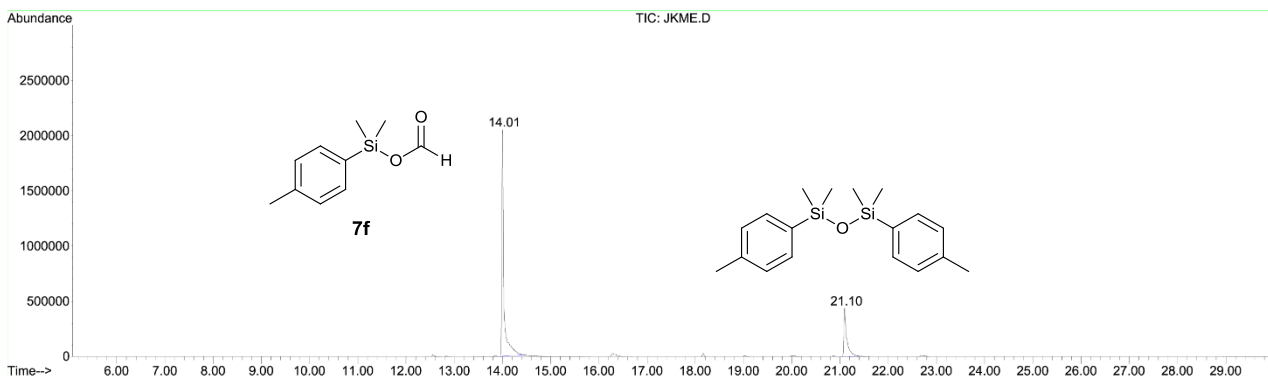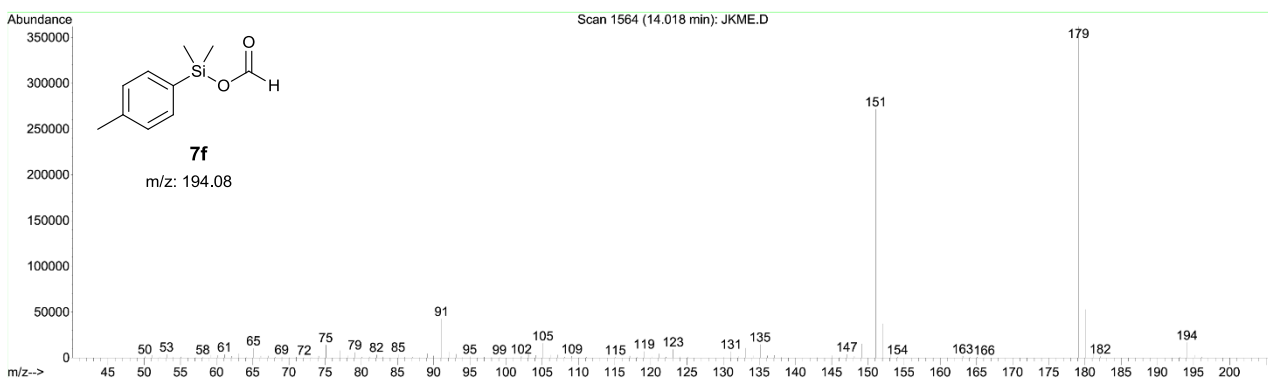

File : C:\MSDCHEM\1\DATA\SHHONG\KOO\180409\JKME.D  
 Operator : KOO  
 Acquired : 10 Apr 2018 10:35 using AcqMethod DRY\_MS  
 Instrument : Instrumen  
 Sample Name: JKME  
 Misc Info :  
 Vial Number: 22

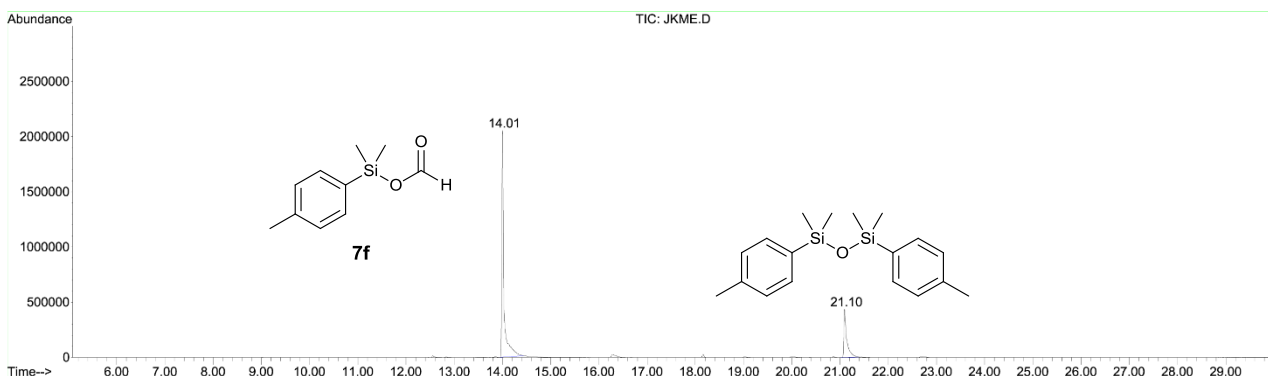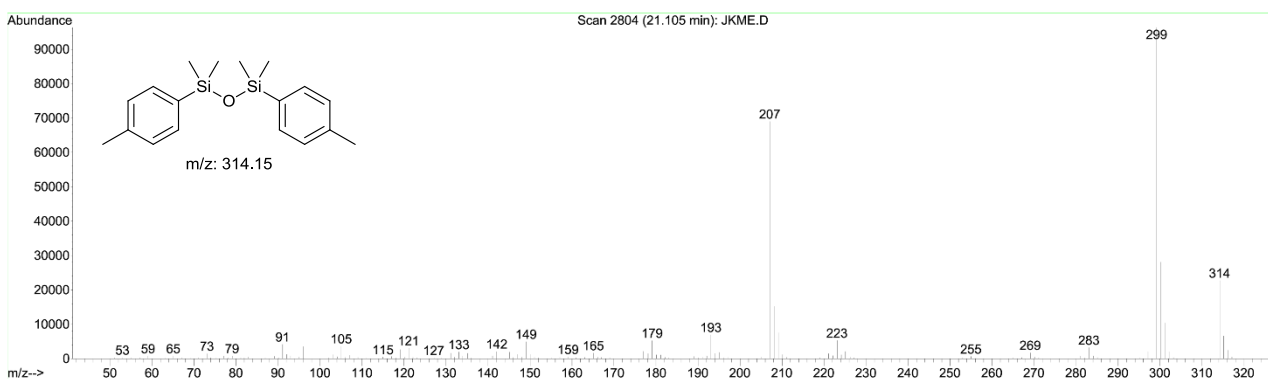

File : C:\MSDCHEM\1\DATA\SHHONG\KOO\JKPH2ME.D  
 Operator : KOO180409  
 Acquired : 9 Apr 2018 15:12 using AcqMethod DRY\_MS  
 Instrument : Instrumen  
 Sample Name: JKPH2ME  
 Misc Info :  
 Vial Number: 23

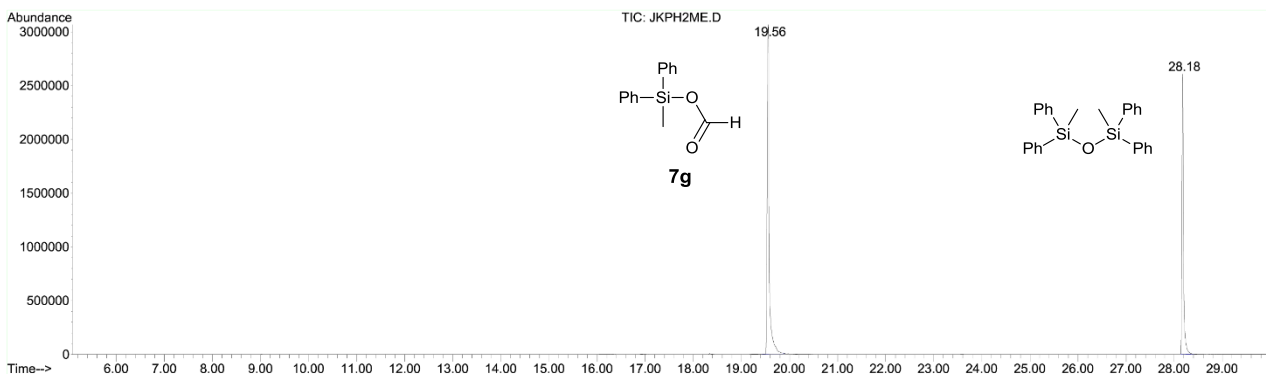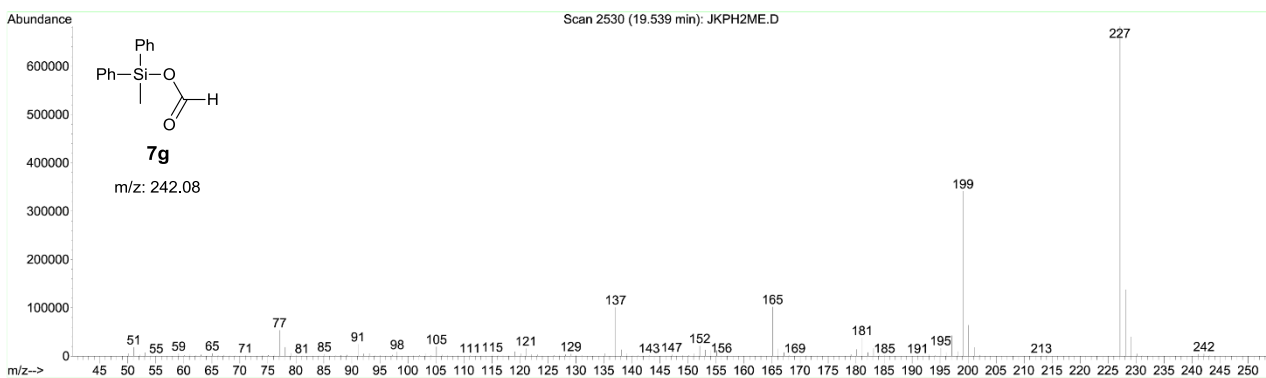

File : C:\MSDCHEM\1\DATA\SHHONG\KOO\JKPH2ME.D  
 Operator : KOO180409  
 Acquired : 9 Apr 2018 15:12 using AcqMethod DRY\_MS  
 Instrument : Instrumen  
 Sample Name: JKPH2ME  
 Misc Info :  
 Vial Number: 23

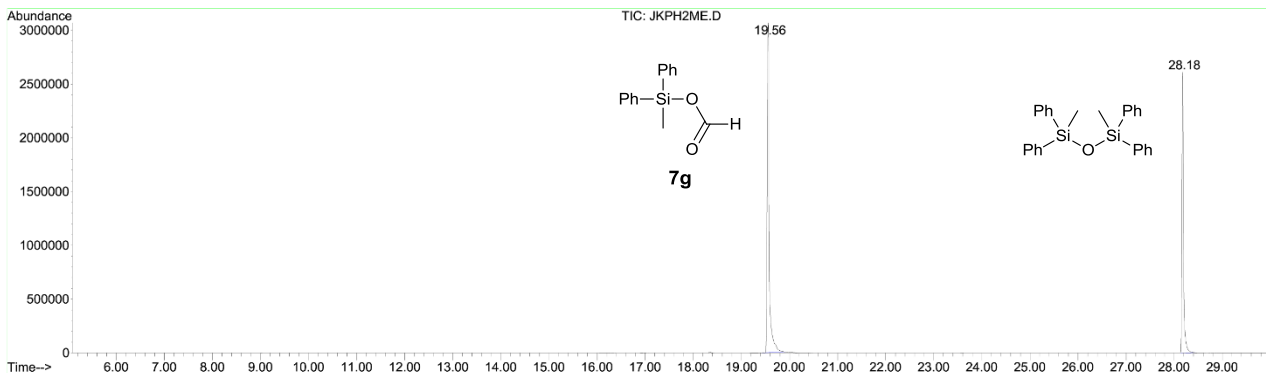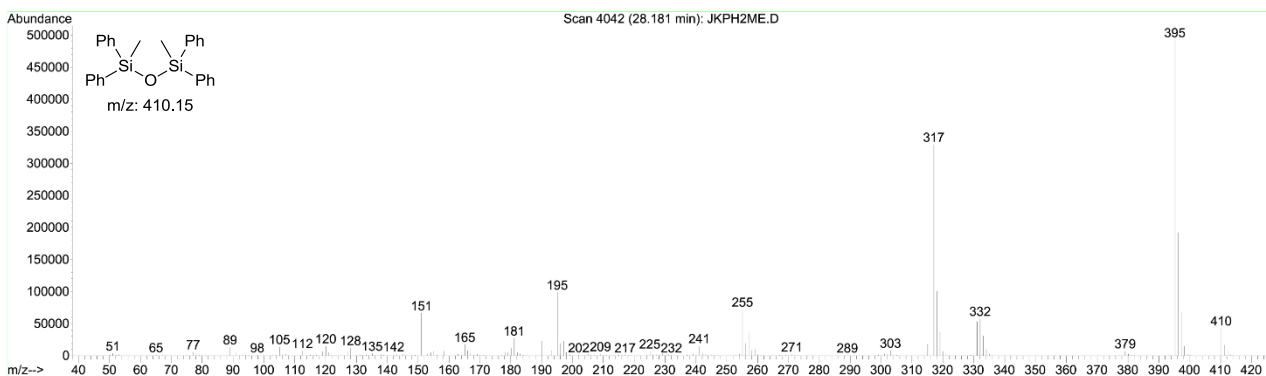

File : C:\MSDCHEM\1\DATA\SHHONG\KOO\180409\JKCF3.D  
 Operator : KOO  
 Acquired : 14 Apr 2018 13:15 using AcqMethod DRY\_MS  
 Instrument : Instrumen  
 Sample Name : jkCF3  
 Misc Info :  
 Vial Number: 21

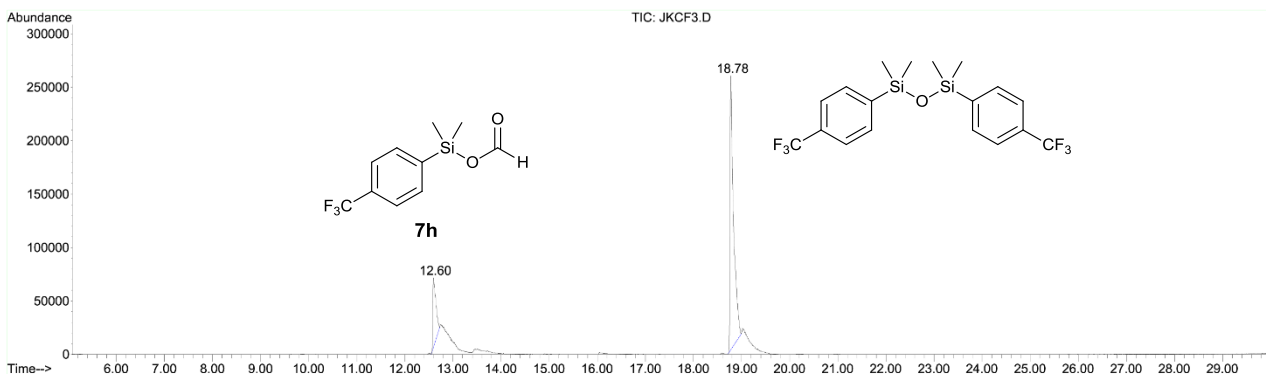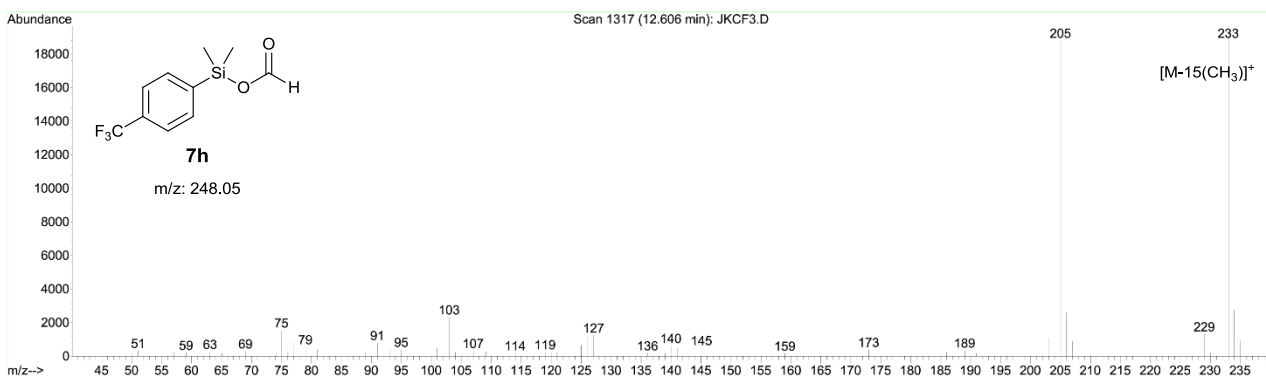

File : C:\MSDCHEM\1\DATA\SHHONG\KOO\180409\JKCF3.D  
 Operator : KOO  
 Acquired : 14 Apr 2018 13:15 using AcqMethod DRY\_MS  
 Instrument : Instrumen  
 Sample Name : jkCF3  
 Misc Info :  
 Vial Number: 21

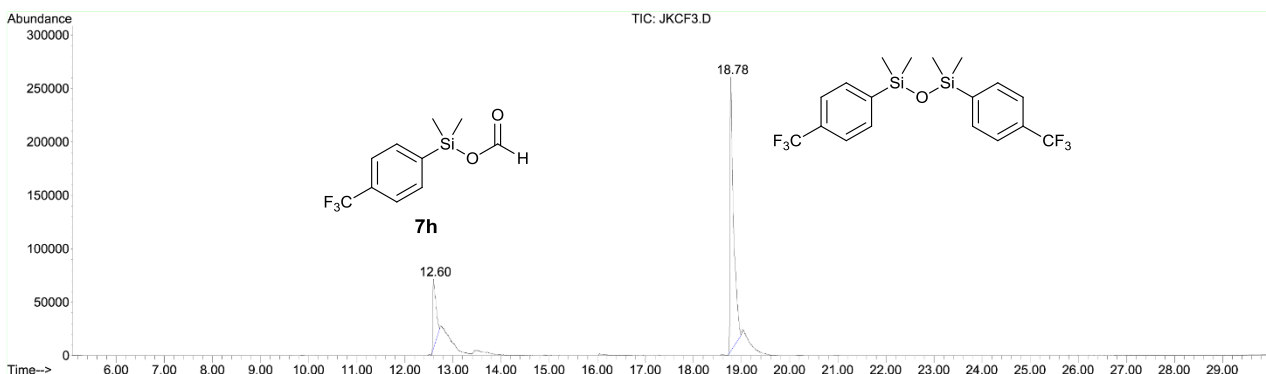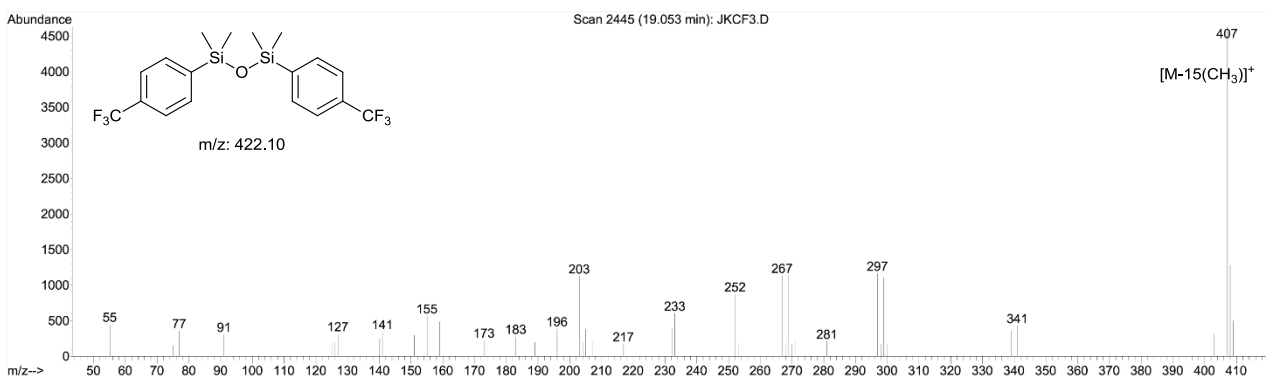

File : C:\MSDCHEM\1\DATA\SHHONG\KOO\JKCL.D  
 Operator : KOO180409  
 Acquired : 9 Apr 2018 14:27 using AcqMethod DRY\_MS  
 Instrument : Instrumen  
 Sample Name: JKCL  
 Misc Info :  
 Vial Number: 22

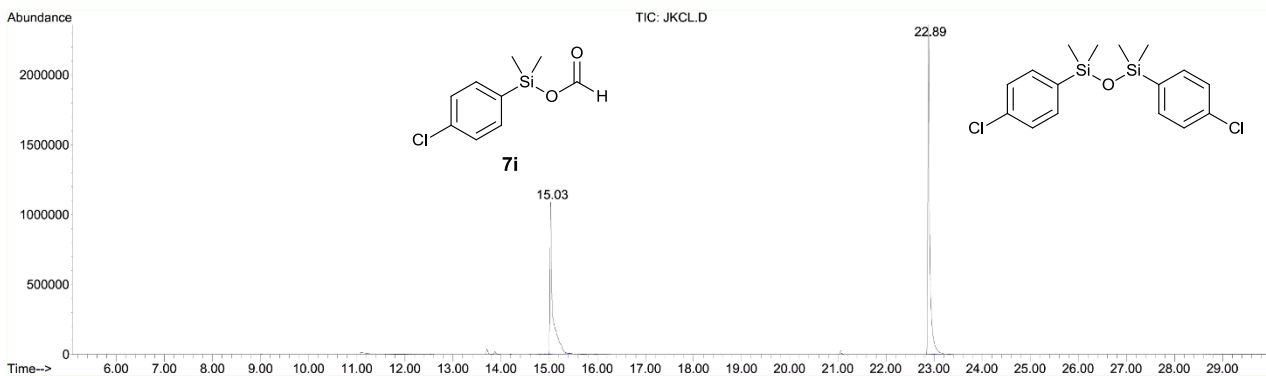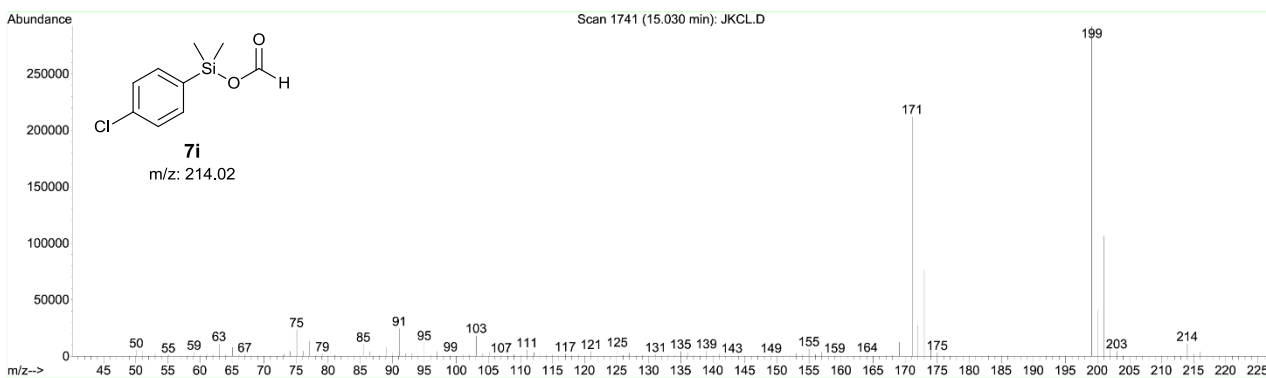

File : C:\MSDCHEM\1\DATA\SHHONG\KOO\JKCL.D  
 Operator : KOO180409  
 Acquired : 9 Apr 2018 14:27 using AcqMethod DRY\_MS  
 Instrument : Instrumen  
 Sample Name: JKCL  
 Misc Info :  
 Vial Number: 22

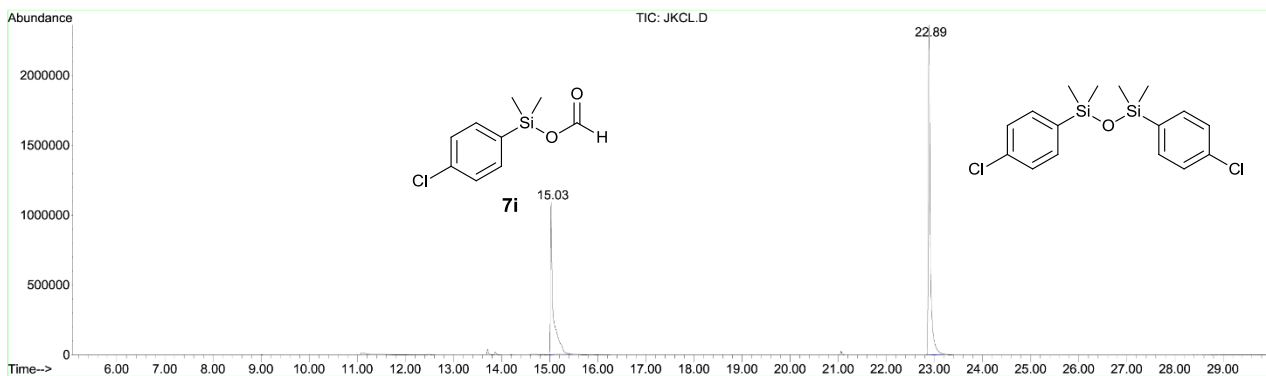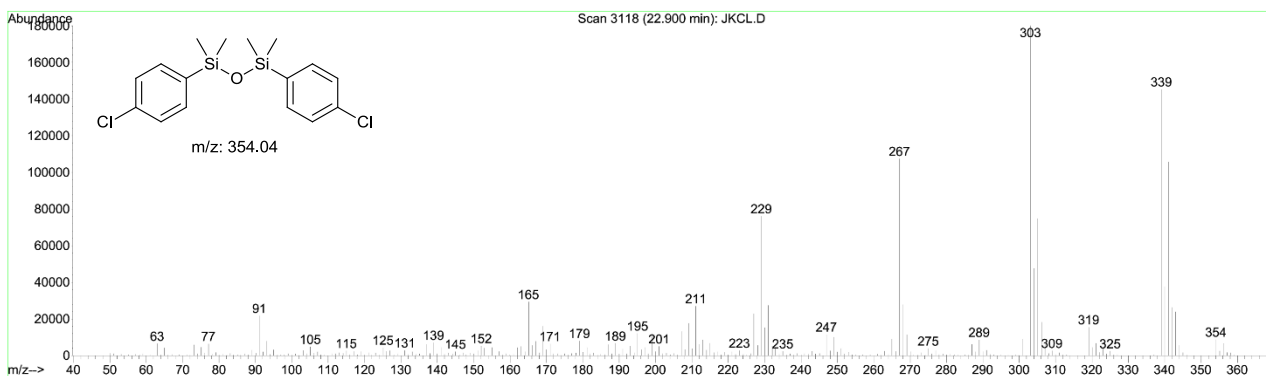



## 6. Hydrogenation of Silyl Formates

Inside a glove box, a 67mL stainless steel autoclave containing a magnetic stirring bar was charged with complex **3** (1 mol%, 2.93 mg, 0.005 mmol). Silyl formate **7** (1.0 equiv, 0.5 mmol) was then added to the reactor as a solution in tetrahydrofuran (0.025 M, 20.0 mL). The reactor was sealed, pressurized with H<sub>2</sub> (10 bar), and heated to 150 °C for 12 h. Upon completion of the reaction, the mixture was cooled to 0 °C for 30 minutes. Unreacted H<sub>2</sub> was carefully released in a fumehood. Methanol was analyzed by GC using *p*-xylene (1.0 equiv, 61.6 μL, 0.5 mmol) as an internal standard, and silanol was isolated by silica column chromatography with hexane/ethyl acetate (20:1).

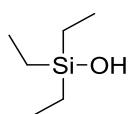

### Triethylsilanol (**8a**)

Colorless liquid (60.8 mg, 0.460 mmol, 92%). Reaction was conducted with 0.1 mol% of **3**. <sup>1</sup>H NMR (300 MHz, CDCl<sub>3</sub>) δ = 1.40 (s, 1H), 0.97 (t, *J*=7.9, 9H), 0.60 (q, *J*=7.9, 6H). <sup>13</sup>C NMR (75 MHz, CDCl<sub>3</sub>) δ = 6.69, 5.89. The identity of the compound was confirmed by comparison with reported data.<sup>8</sup>

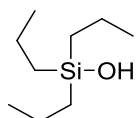

### Tri-*n*-propylsilanol (**8b**)

Colorless liquid (80.2 mg, 0.460 mmol, 92%). Reaction was conducted with 2.0 mol% of **3**. <sup>1</sup>H NMR (300 MHz, CDCl<sub>3</sub>) δ = 2.89 (s, 1H), 1.45 – 1.33 (m, 6H), 0.97 (t, *J*=7.3, 9H), 0.61 – 0.55 (m, 6H). <sup>13</sup>C NMR (75 MHz, CDCl<sub>3</sub>) δ = 18.29, 17.80, 16.63. The identity of the compound was confirmed by comparison with reported data.<sup>9</sup>

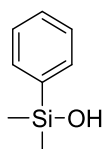

### Dimethylphenylsilanol (**8c**)

Colorless liquid (70.0 mg, 0.460 mmol, 92%). <sup>1</sup>H NMR (300 MHz, CDCl<sub>3</sub>) δ = 7.62 – 7.59 (m, 2H), 7.41 – 7.36 (m, 3H), 2.70 (s, 1H), 0.40 (s, 6H). <sup>13</sup>C NMR (75 MHz, CDCl<sub>3</sub>) δ = 139.23, 133.18, 129.71, 127.99, 0.06. The identity of the compound was confirmed by comparison with reported data.<sup>8</sup>

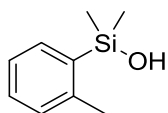

#### Dimethyl(2-methylphenyl)silanol (8d)

Colorless liquid (68.2 mg, 0.410 mmol, 82%). Reaction was conducted with 2 mol% of **3**.  $^1\text{H}$  NMR (300 MHz,  $\text{CDCl}_3$ )  $\delta$  = 7.57 (d,  $J=7.1$ , 1H), 7.34 (t,  $J=7.4$ , 1H), 7.21 (t,  $J=7.1$ , 2H), 2.77 (s, 1H), 2.53 (s, 3H), 0.45 (s, 6H).  $^{13}\text{C}$  NMR (75 MHz,  $\text{CDCl}_3$ )  $\delta$  = 143.37, 137.47, 134.22, 129.98, 129.91, 125.03, 22.86, 1.10. The identity of the compound was confirmed by comparison with reported data.<sup>10</sup>

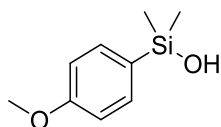

#### Dimethyl(4-methoxyphenyl)silanol (8e)

Colorless liquid (69.3 mg, 0.380 mmol, 76%). Reaction was conducted with 80 bar of  $\text{H}_2$  pressure.  $^1\text{H}$  NMR (300 MHz,  $\text{CDCl}_3$ )  $\delta$  = 7.53 (d,  $J=8.6$ , 2H), 6.93 (d,  $J=8.5$ , 2H), 3.82 (s, 3H), 2.12 (s, 1H), 0.39 (s, 6H).  $^{13}\text{C}$  NMR (75 MHz,  $\text{CDCl}_3$ )  $\delta$  = 160.93, 134.76, 130.33, 113.73, 55.17, 0.20. The identity of the compound was confirmed by comparison with reported data.<sup>11</sup>

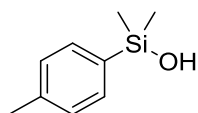

#### Dimethyl(4-methylphenyl)silanol (8f)

Colorless liquid (62.4 mg, 0.375 mmol, 75%). Reaction was conducted with 80 bar of  $\text{H}_2$  pressure.  $^1\text{H}$  NMR (300 MHz,  $\text{CDCl}_3$ )  $\delta$  = 7.51 (d,  $J=7.9$ , 2H), 7.22 (d,  $J=7.7$ , 2H), 2.38 (s, 3H), 2.16 (s, 1H), 0.40 (s, 6H).  $^{13}\text{C}$  NMR (75 MHz,  $\text{CDCl}_3$ )  $\delta$  = 139.70, 135.66, 133.25, 128.83, 21.63, 0.14. The identity of the compound was confirmed by comparison with reported data.<sup>11</sup>

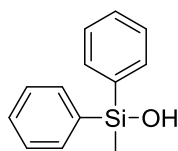

#### Diphenylmethylsilanol (8g)

Colorless liquid (30.0 mg, 0.140 mmol, 28%).  $^1\text{H}$  NMR (300 MHz,  $\text{CDCl}_3$ )  $\delta$  = 7.65 (dd,  $J=7.8$ , 1.5, 4H), 7.51 – 7.39 (m, 6H), 3.43 (s, 1H), 0.67 (s, 3H).  $^{13}\text{C}$  NMR (75 MHz,  $\text{CDCl}_3$ )  $\delta$  = 137.12, 134.09, 129.90, 127.96, -1.25. The identity of the compound was confirmed by comparison with reported data.<sup>8</sup>

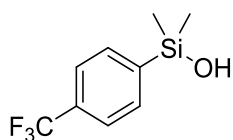

### Dimethyl(4-trifluoromethylphenyl)silanol (**8h**)

Colorless liquid (74.9 mg, 0.340 mmol, 68%).  $^1\text{H}$  NMR (300 MHz,  $\text{CDCl}_3$ )  $\delta$  = 7.71 (d,  $J$ =7.9, 2H), 7.62 (d,  $J$ =8.2, 2H), 1.97 (s, 1H), 0.43 (s, 6H).  $^{13}\text{C}$  NMR (75 MHz,  $\text{CDCl}_3$ )  $\delta$  = 143.97, 133.50, 132.29, 131.87, 131.44, 131.01, 129.70, 126.09, 124.65, 124.60, 124.55, 124.50, 122.49, 118.88, 0.13. The identity of the compound was confirmed by comparison with reported data.<sup>10</sup>

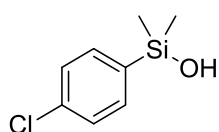

### Dimethyl(4-chlorophenyl)silanol (**8i**)

Colorless liquid (49.5 mg, 0.265 mmol, 53%).  $^1\text{H}$  NMR (300 MHz,  $\text{CDCl}_3$ )  $\delta$  = 7.48 (d,  $J$ =8.2, 2H), 7.34 (d,  $J$ =8.2, 2H), 2.84 (s, 1H), 0.36 (s, 6H).  $^{13}\text{C}$  NMR (75 MHz,  $\text{CDCl}_3$ )  $\delta$  = 137.42, 136.02, 134.58, 128.22, 0.10. The identity of the compound was confirmed by comparison with reported data.<sup>12</sup>

## 7. Effect of Siloxane Impurity on the Reaction.

**Table S3.** Effect of Siloxane Impurity on the Reaction.<sup>a</sup>

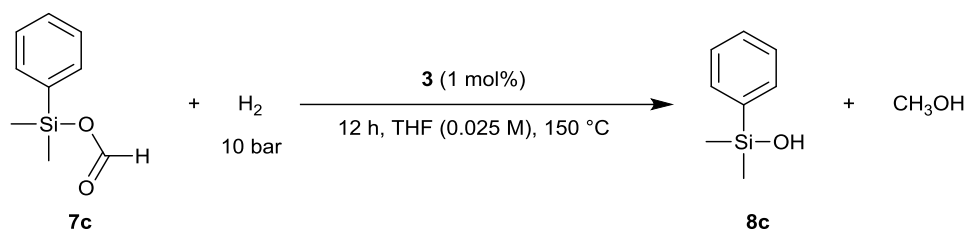

| entry | purity <sup>b</sup> | yield <sup>c</sup> |                        |
|-------|---------------------|--------------------|------------------------|
|       |                     | <b>8c</b>          | $\text{CH}_3\text{OH}$ |
| 1     | 94                  | 92                 | 99                     |
| 2     | 87                  | 91                 | 99                     |
| 3     | 75                  | 92                 | 99                     |

<sup>a</sup> Reaction conditions: **7c** (0.5 mmol, 1.0 equiv.), **3** (1 mol%), THF (20 mL), 150 °C,  $\text{H}_2$  (10 bar). <sup>b</sup> Purity was checked by  $^1\text{H}$  NMR. <sup>c</sup> Yields were determined by GC analysis using *p*-xylene as an internal standard.

## 8. References

1. S. Itagaki, K. Yamaguchi and N. Mizuno, *J. Mol. Catal. A: Chem.*, 2013, **366**, 347-352.
2. A. Jansen and S. Pitter, *J. Mol. Catal. A: Chem.*, 2004, **217**, 41-45.
3. G. Süss-Fink and J. Reiner, *J. Organomet. Chem.*, 1981, **221**, C36-C38.
4. H. Koinuma, F. Kawakami, H. Kato and H. Hirai, *J. Chem. Soc., Chem. Commun.*, 1981, **0**, 213-214.  
(DOI: 10.1039/C39810000213)
5. L. Zhang, J. Cheng and Z. Hou, *Chem. Commun.*, 2013, **49**, 4782-4784.
6. K. Motokura, D. Kashiwame, A. Miyaji and T. Baba, *Org. Lett.*, 2012, **14**, 2642-2645.
7. A. Julián, J. Guzmán, E. A. Jaseer, F. J. Fernández-Alvarez, R. Royo, V. Polo, P. García-Orduña, F. J. Lahoz and L. A. Oro, *Chem. Eur. J.*, 2017, **23**, 11898-11907.
8. J. John, E. Gravel, A. Hagège, H. Li, T. Gacoin and E. Doris, *Angew. Chem. Int. Ed.*, 2011, **50**, 7533-7536.
9. T. Mitsudome, A. Noujima, T. Mizugaki, K. Jitsukawa and K. Kaneda, *Chem. Commun.*, 2009, **0**, 5302-5304. (DOI: 10.1039/B910208F)
10. H. Kazunori, A. Jun-ichi, K. Jun, N. Yasushi, M. Atsunori and H. Tamejiro, *Bull. Chem. Soc. Jpn.*, 2000, **73**, 1409-1417.
11. S. E. Denmark and J. M. Kallemeyn, *Org. Lett.*, 2003, **5**, 3483-3486.
12. T. Mitsudome, S. Arita, H. Mori, T. Mizugaki, K. Jitsukawa and K. Kaneda, *Angew. Chem. Int. Ed.*, 2008, **47**, 7938-7940.

## 9. NMR Spectra

$^1\text{H}$  NMR (**7a**) ( $\text{C}_6\text{D}_6$ )

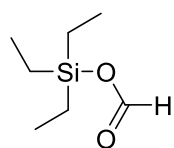

(purity: 94%)

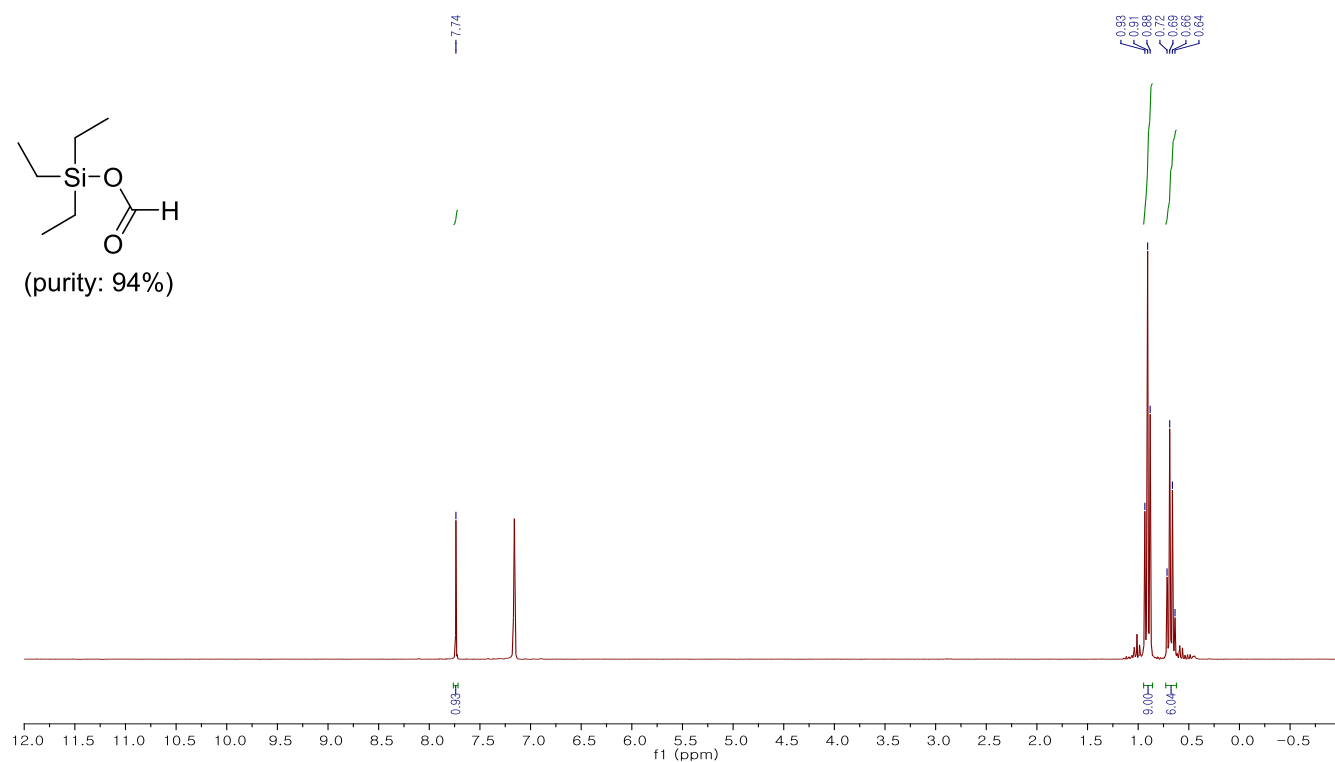

$^1\text{H}$  NMR (**7b**) ( $\text{C}_6\text{D}_6$ )

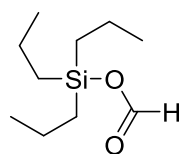

(purity: 90%)

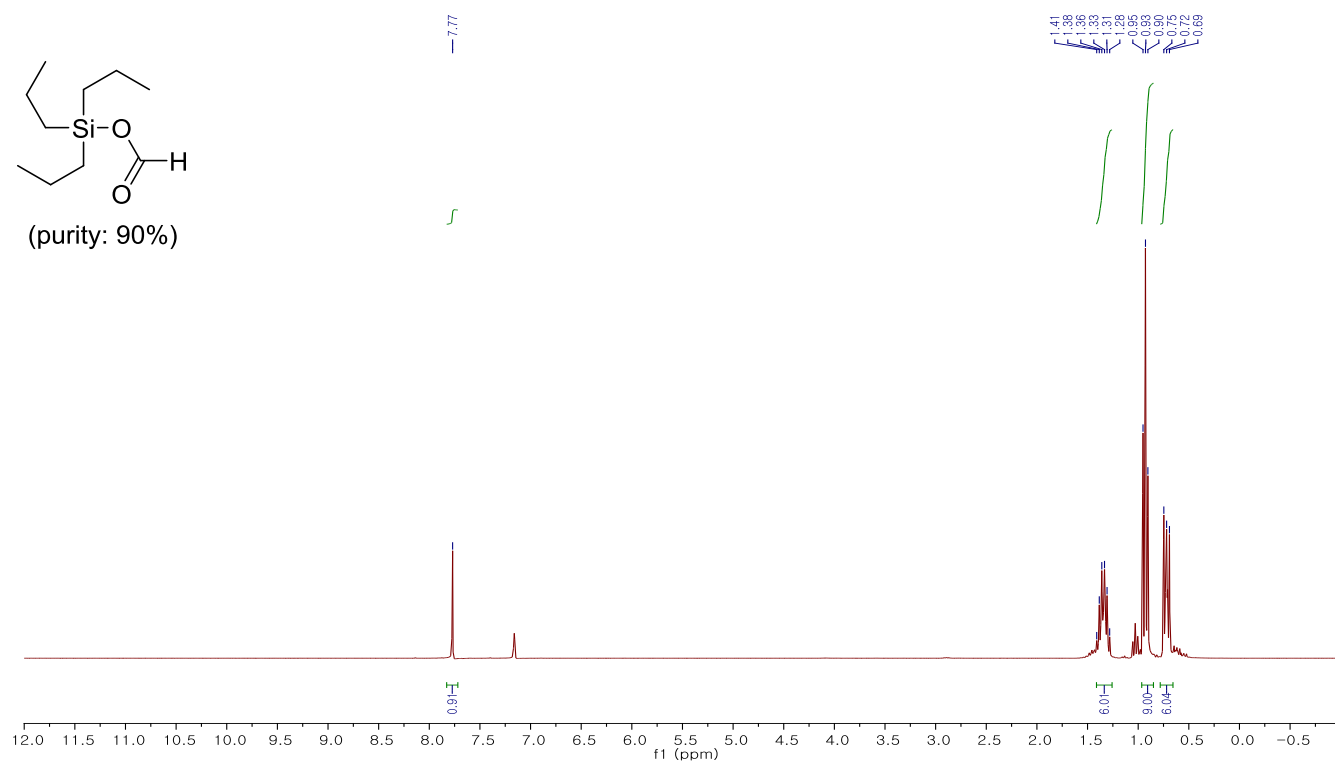

$^{13}\text{C}$  NMR (**7b**) ( $\text{C}_6\text{D}_6$ )

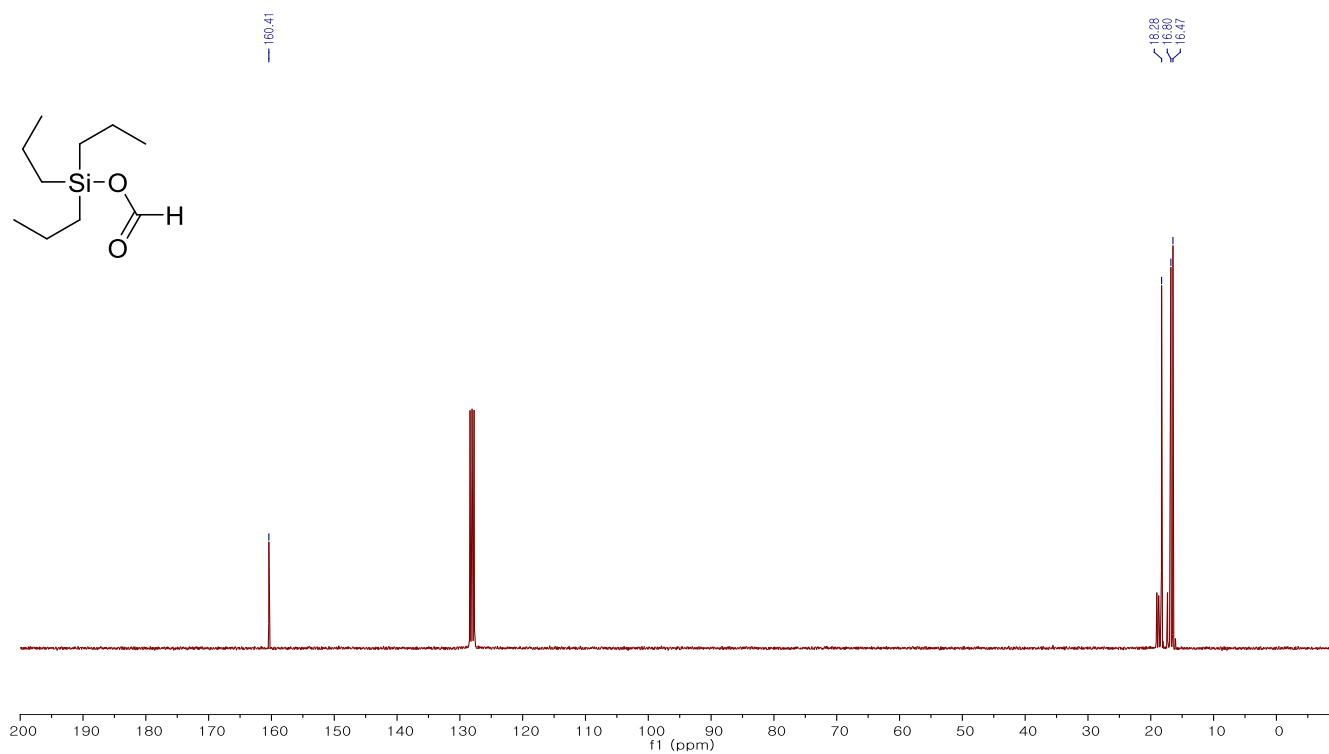

$^1\text{H}$  NMR (**7c**) ( $\text{C}_6\text{D}_6$ )

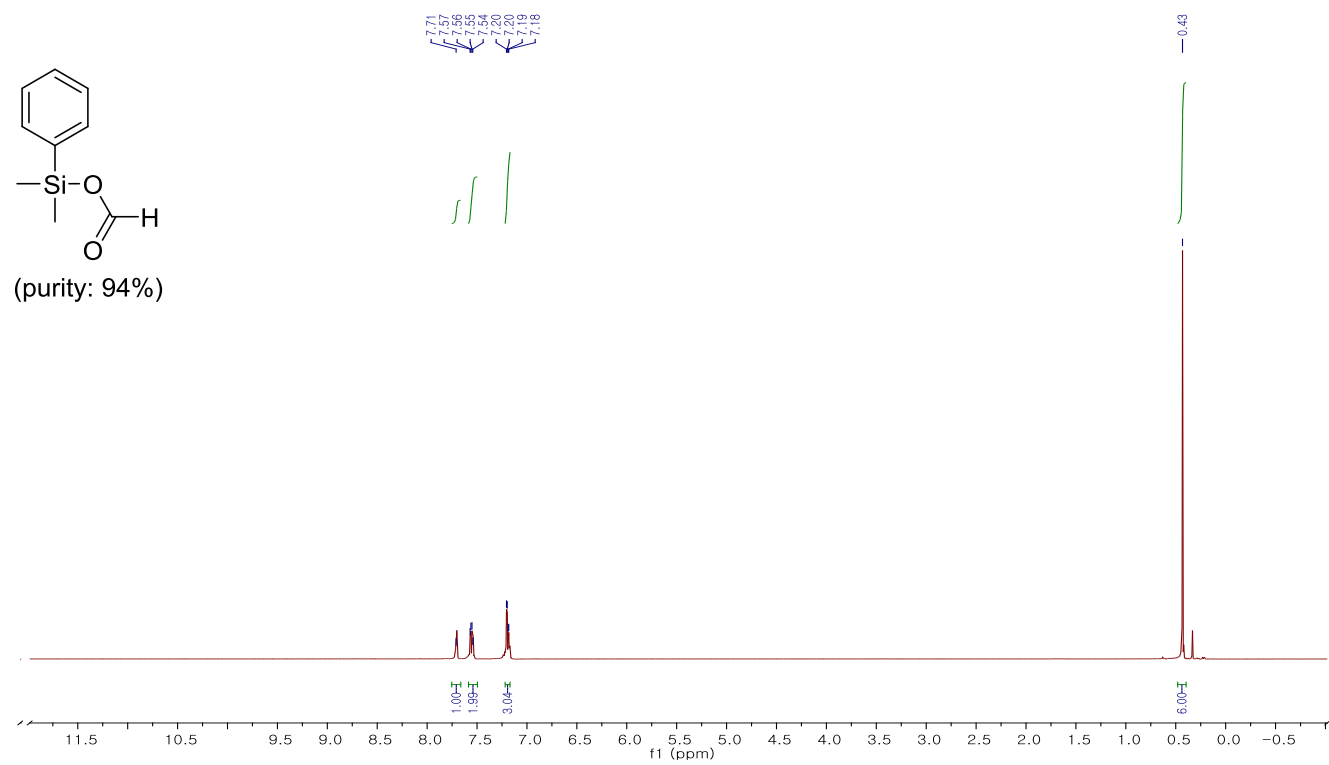

### $^1\text{H}$ NMR (**7d**) ( $\text{C}_6\text{D}_6$ )

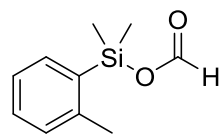

(purity: 90%)

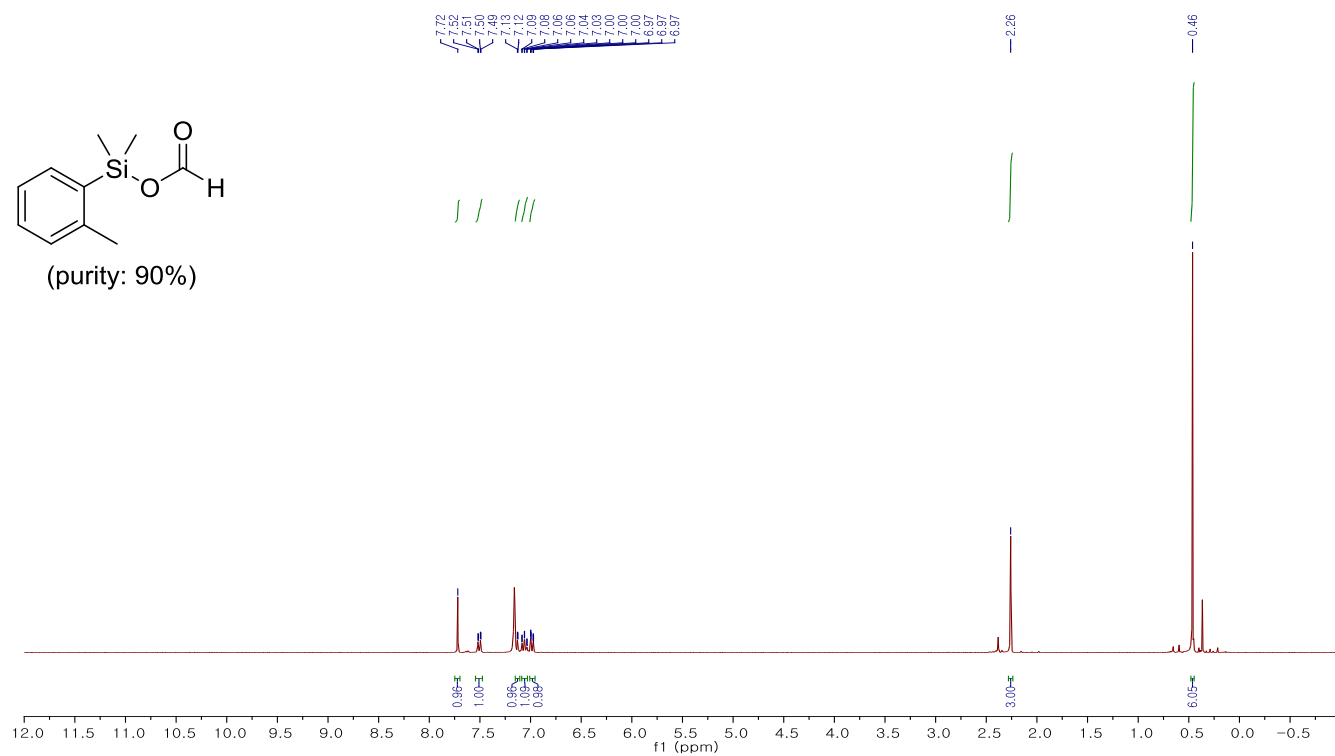

### $^{13}\text{C}$ NMR (**7d**) ( $\text{C}_6\text{D}_6$ )

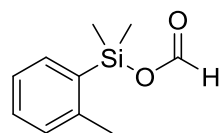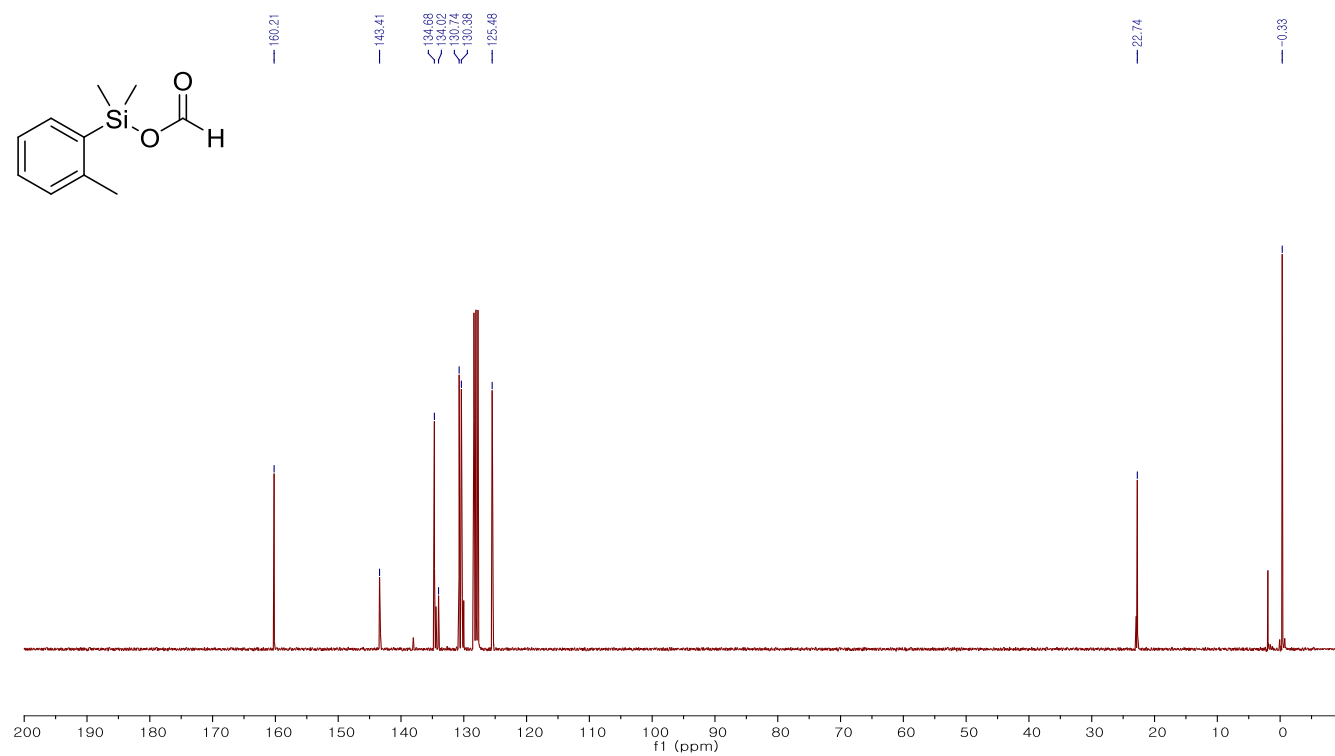

<sup>1</sup>H NMR (**7e**) (CD<sub>3</sub>CN)

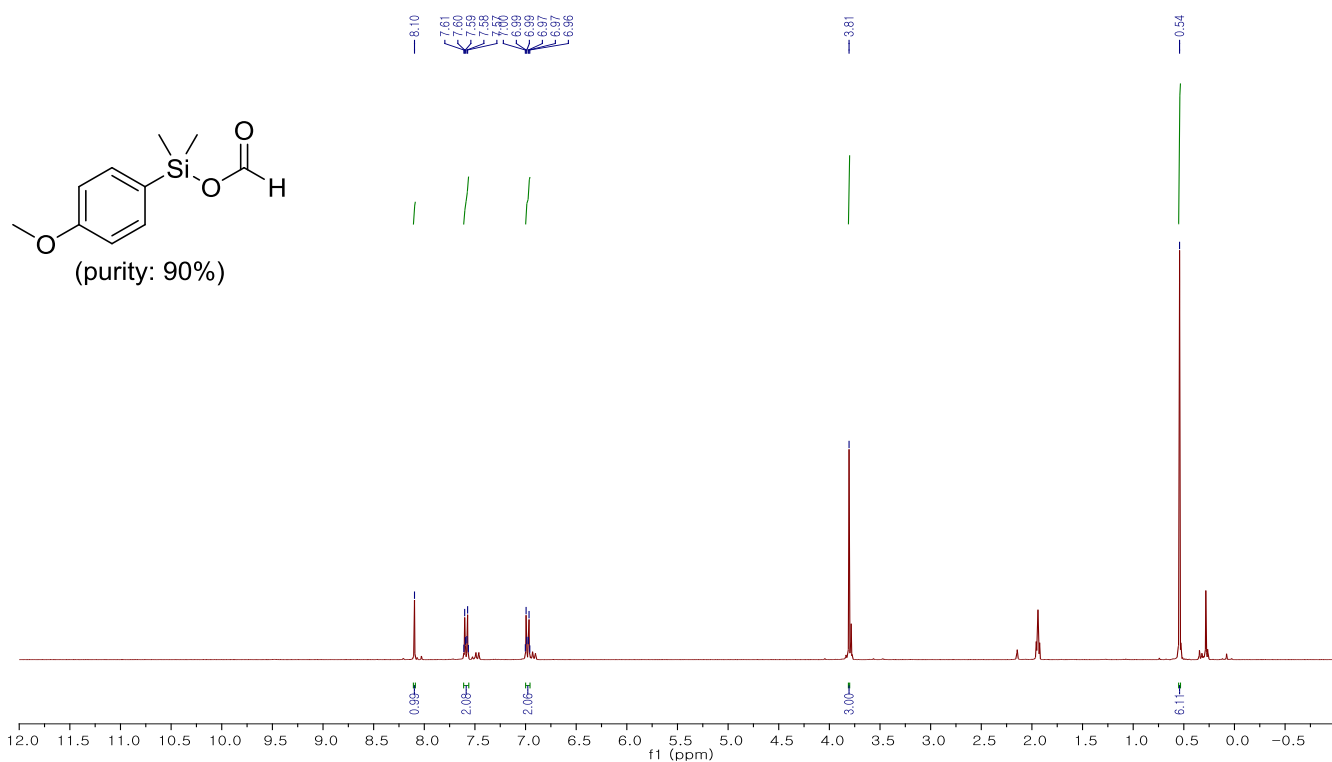

<sup>1</sup>H NMR (**7f**) (C<sub>6</sub>D<sub>6</sub>)

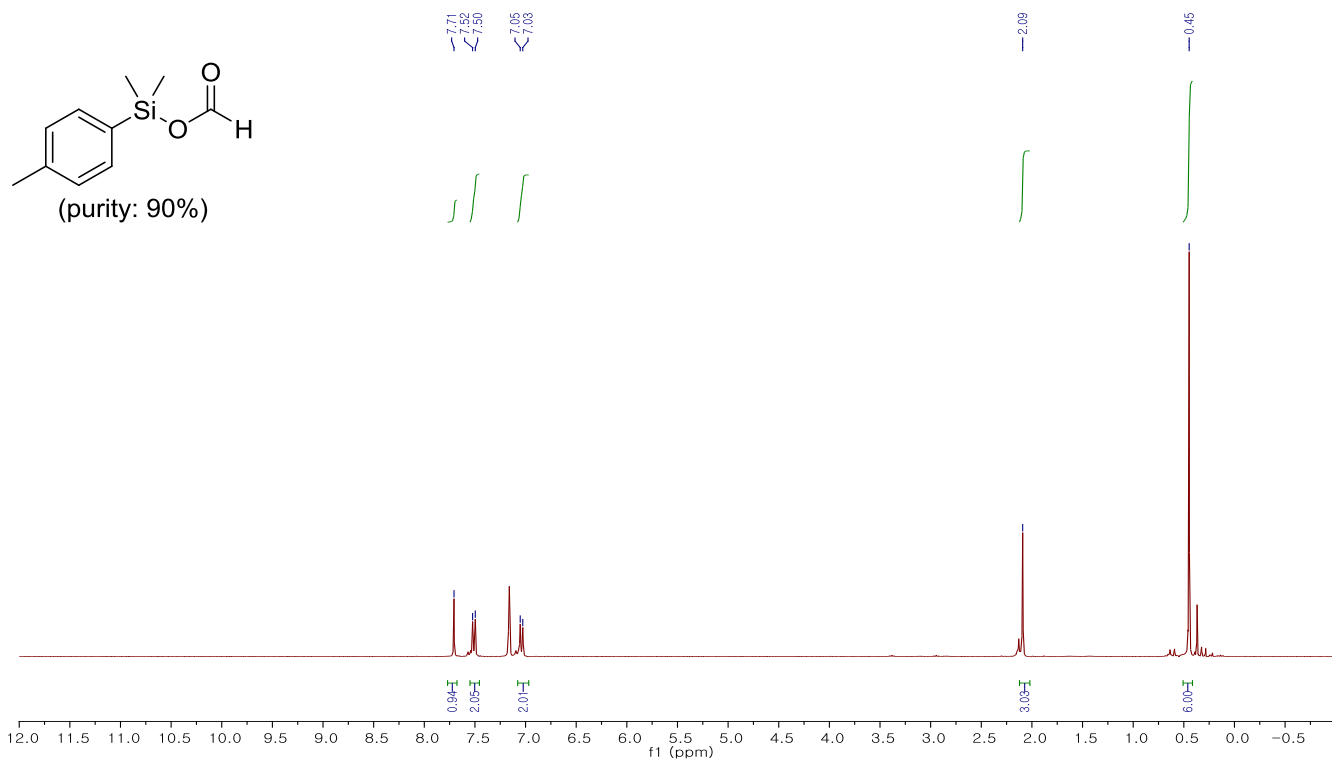



$^{13}\text{C}$  NMR (**7f**) ( $\text{C}_6\text{D}_6$ )

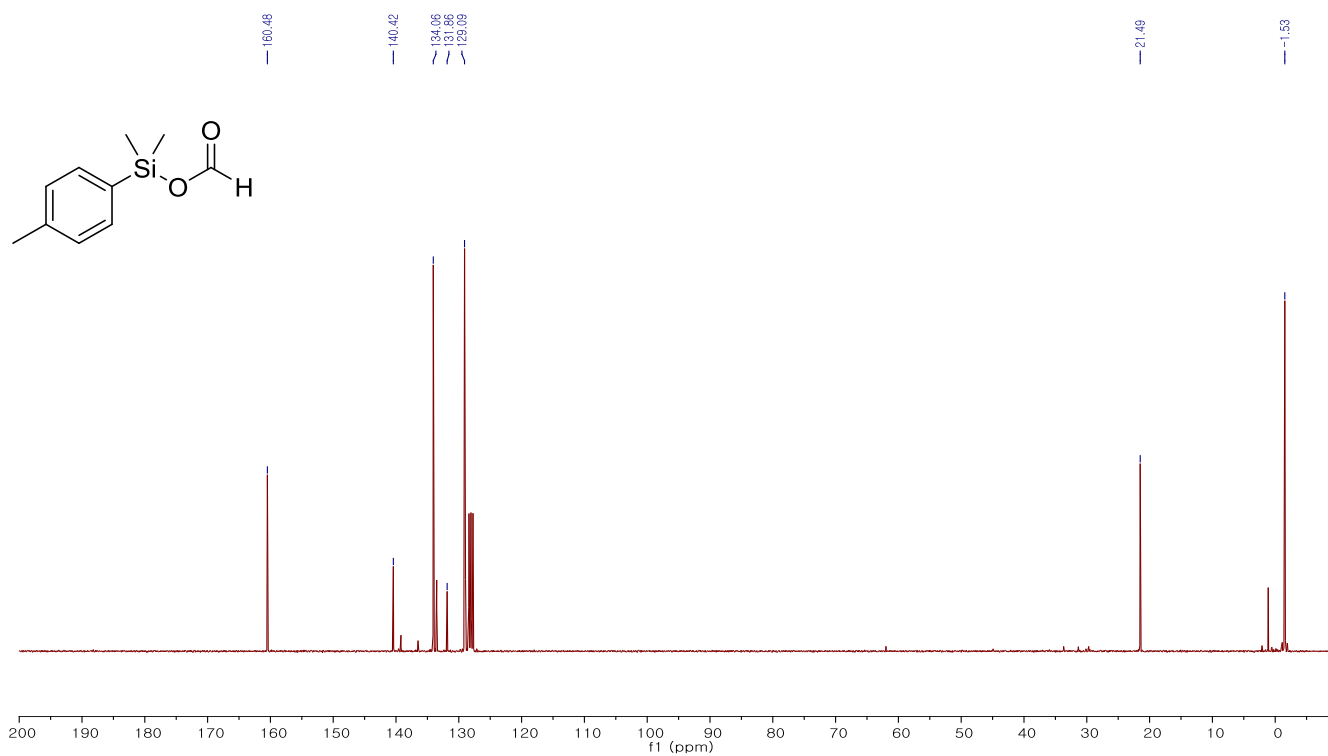

$^1\text{H}$  NMR (**7g**) ( $\text{CD}_3\text{CN}$ )

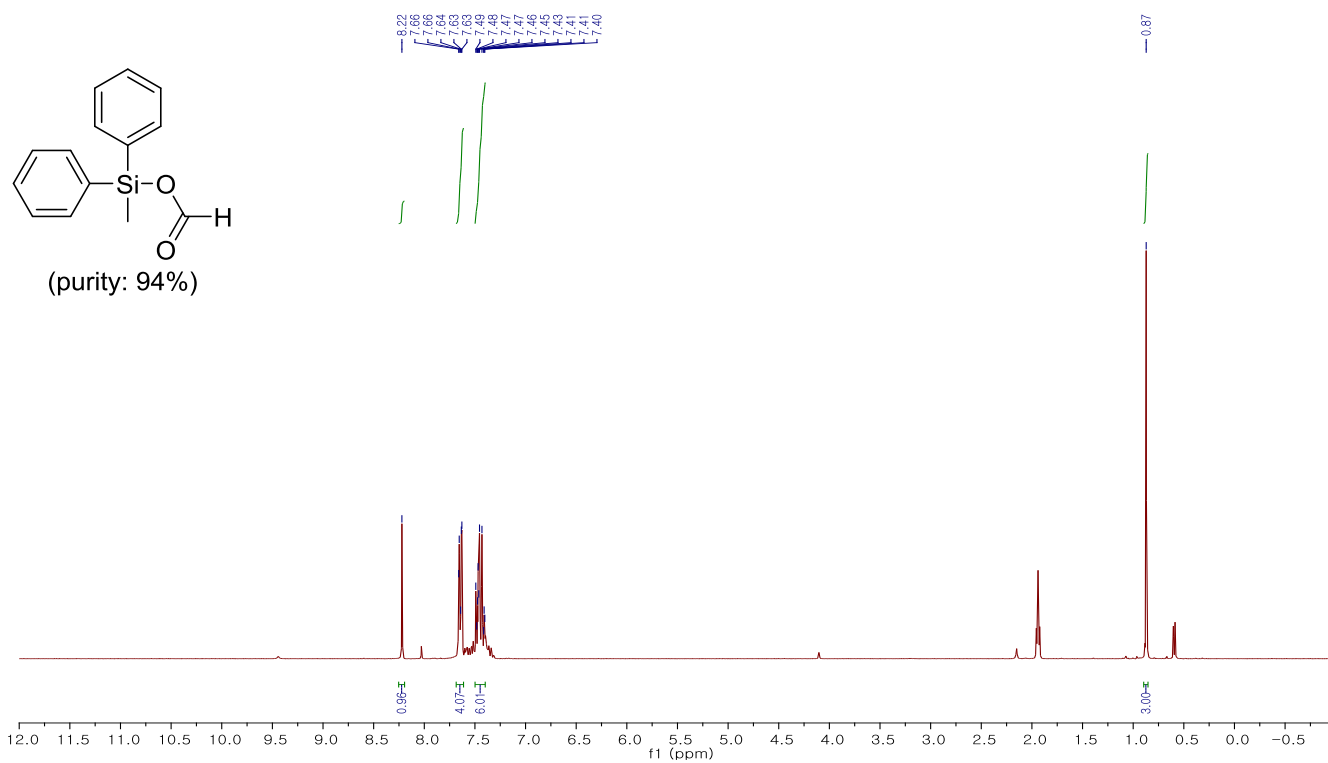

<sup>1</sup>H NMR (**7h**) (CD<sub>3</sub>CN)

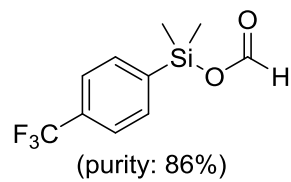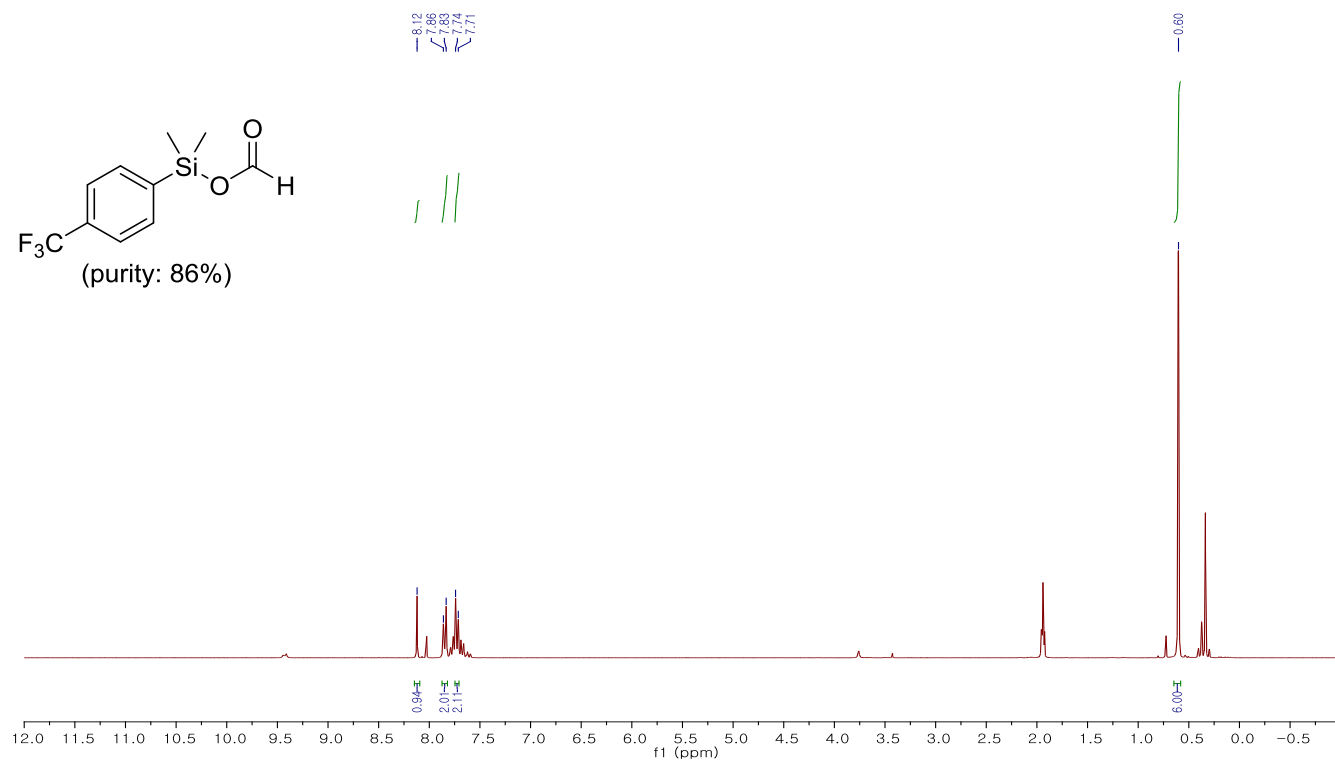

<sup>1</sup>H NMR (**7i**) (CD<sub>3</sub>CN)

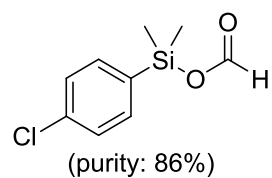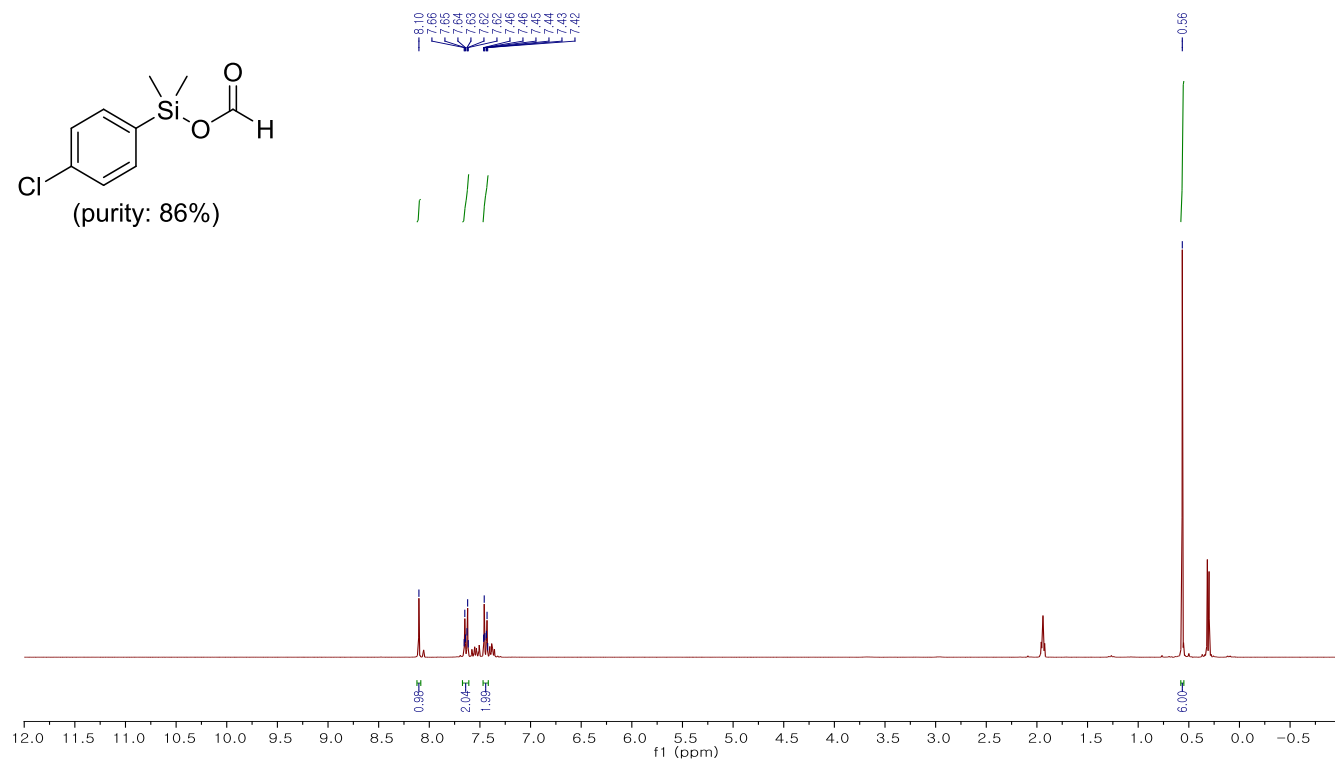

<sup>1</sup>H NMR (**8a**) (CDCl<sub>3</sub>)

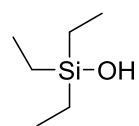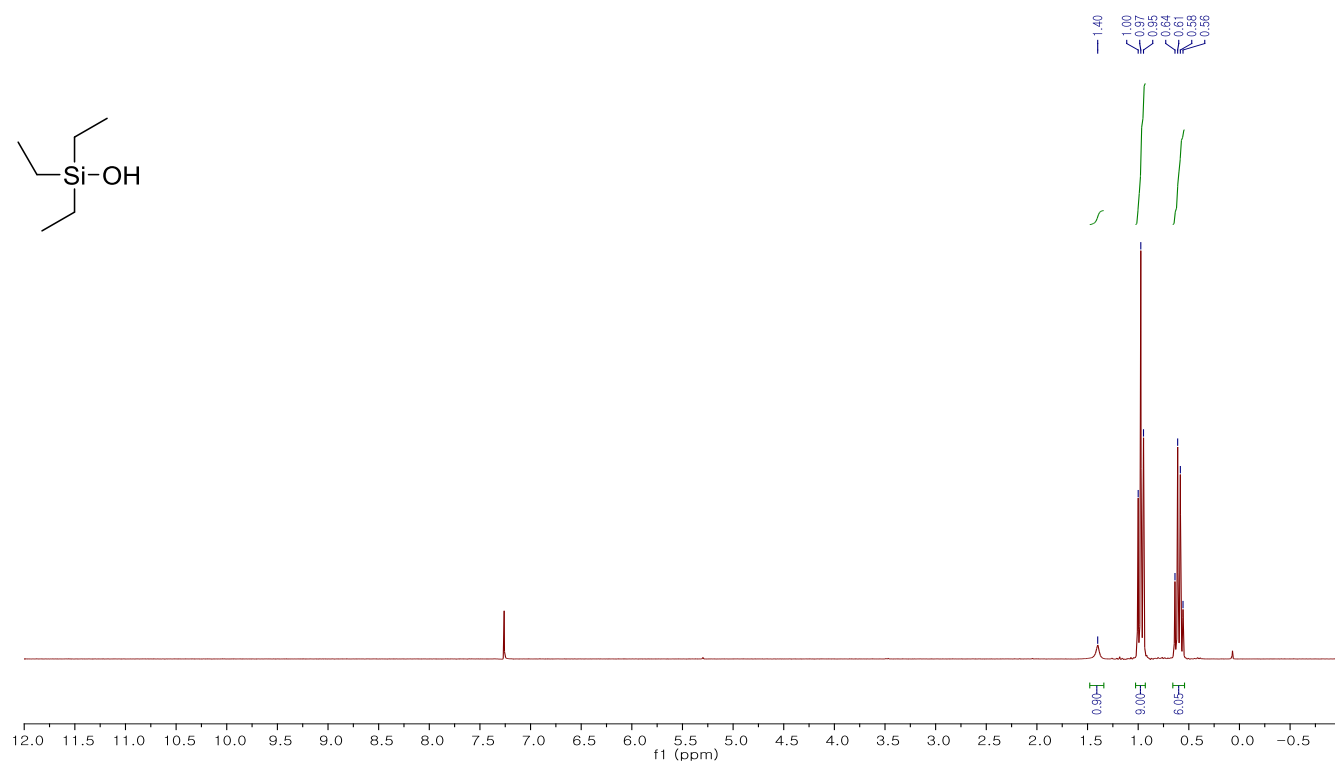

<sup>13</sup>C NMR (**8a**) (CDCl<sub>3</sub>)

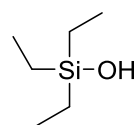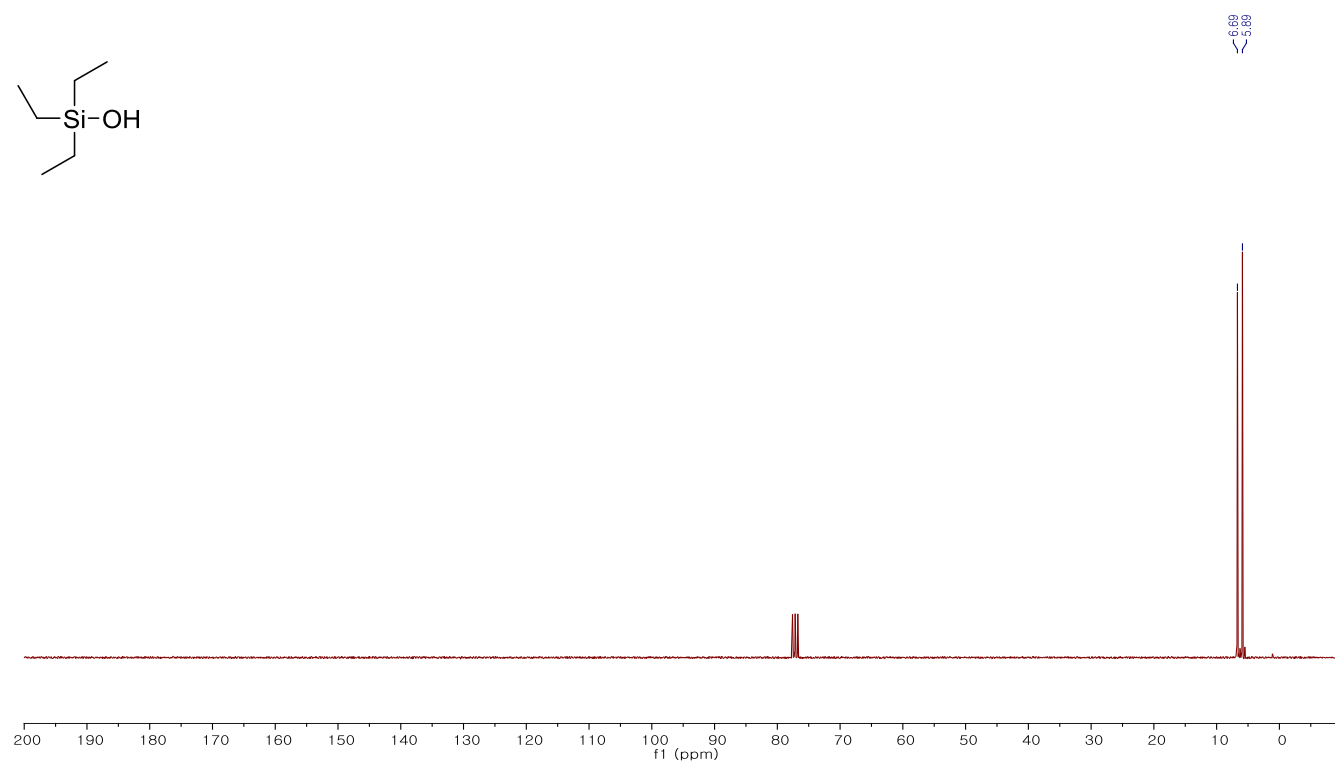

$^1\text{H}$  NMR (**8b**) ( $\text{CDCl}_3$ )

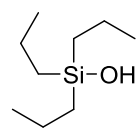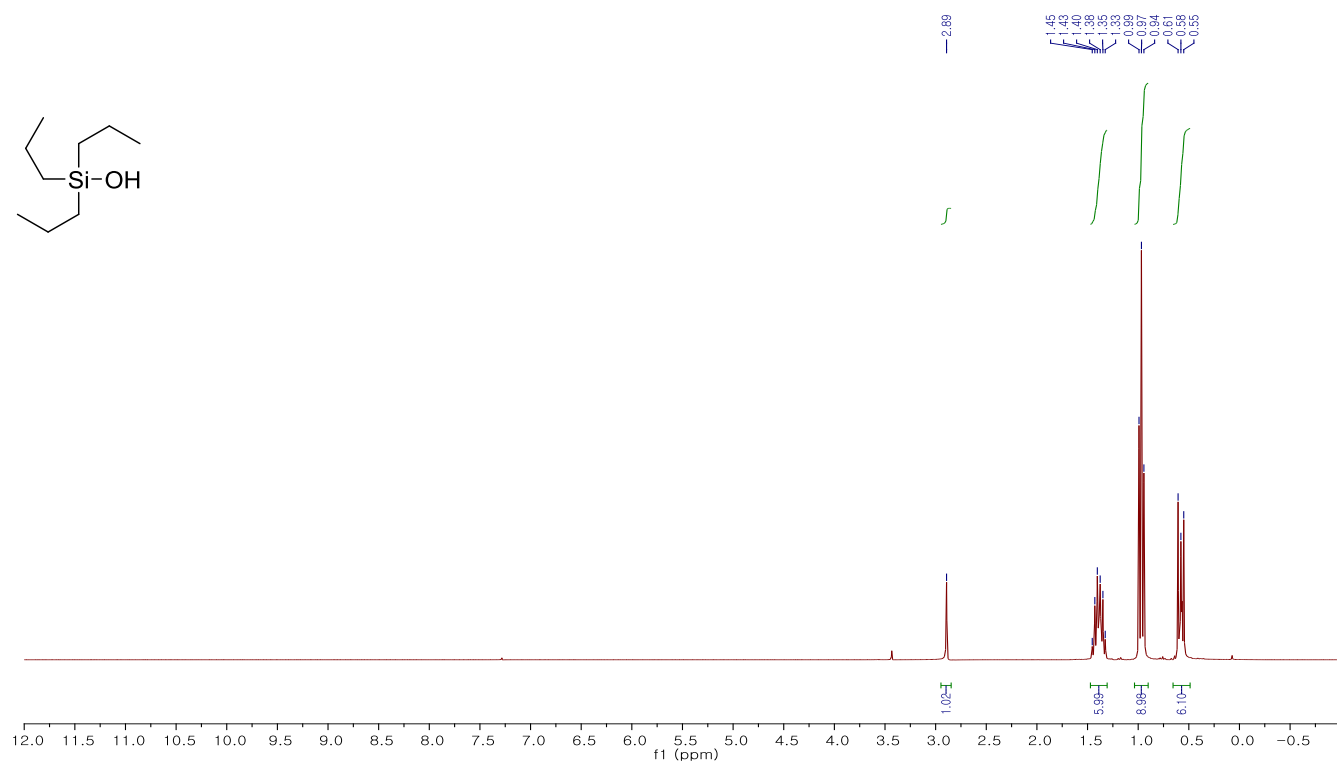

$^{13}\text{C}$  NMR (**8b**) ( $\text{CDCl}_3$ )

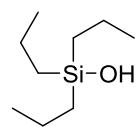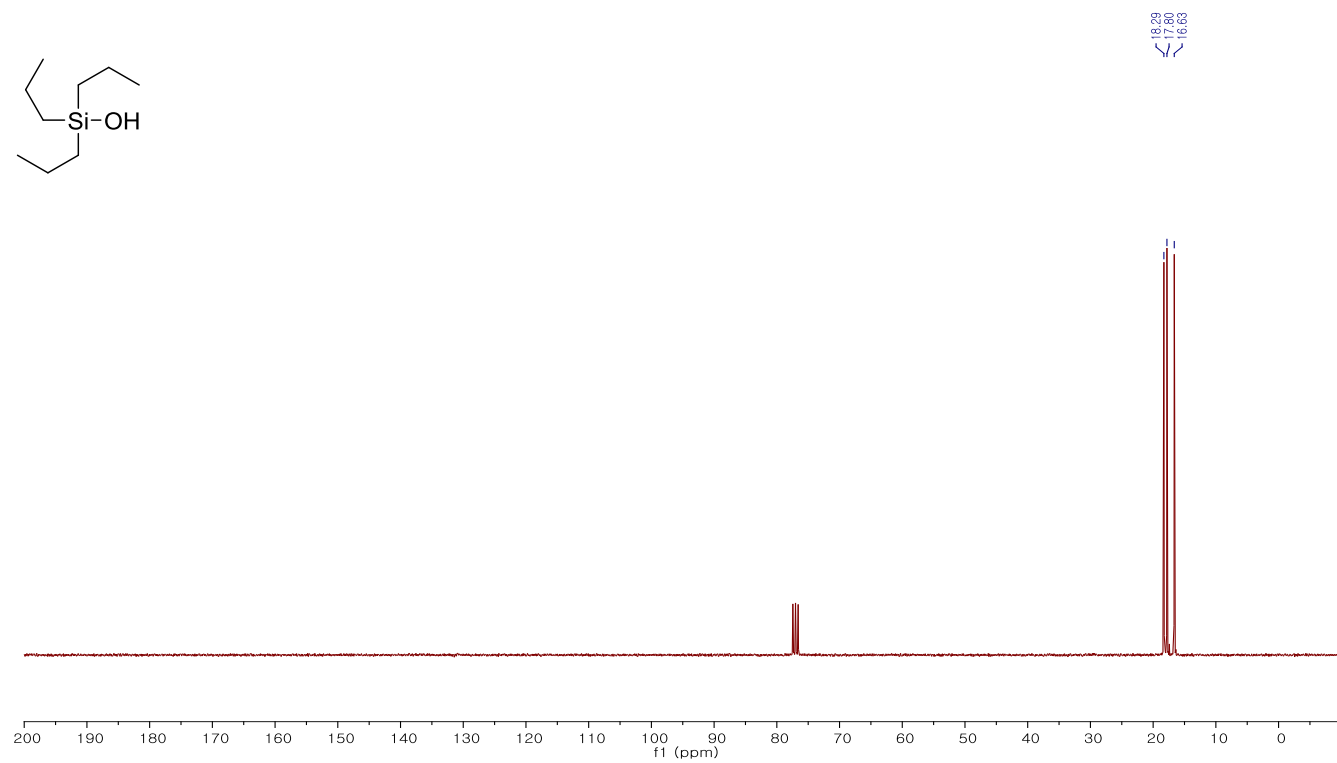

<sup>1</sup>H NMR (8c) (CDCl<sub>3</sub>)

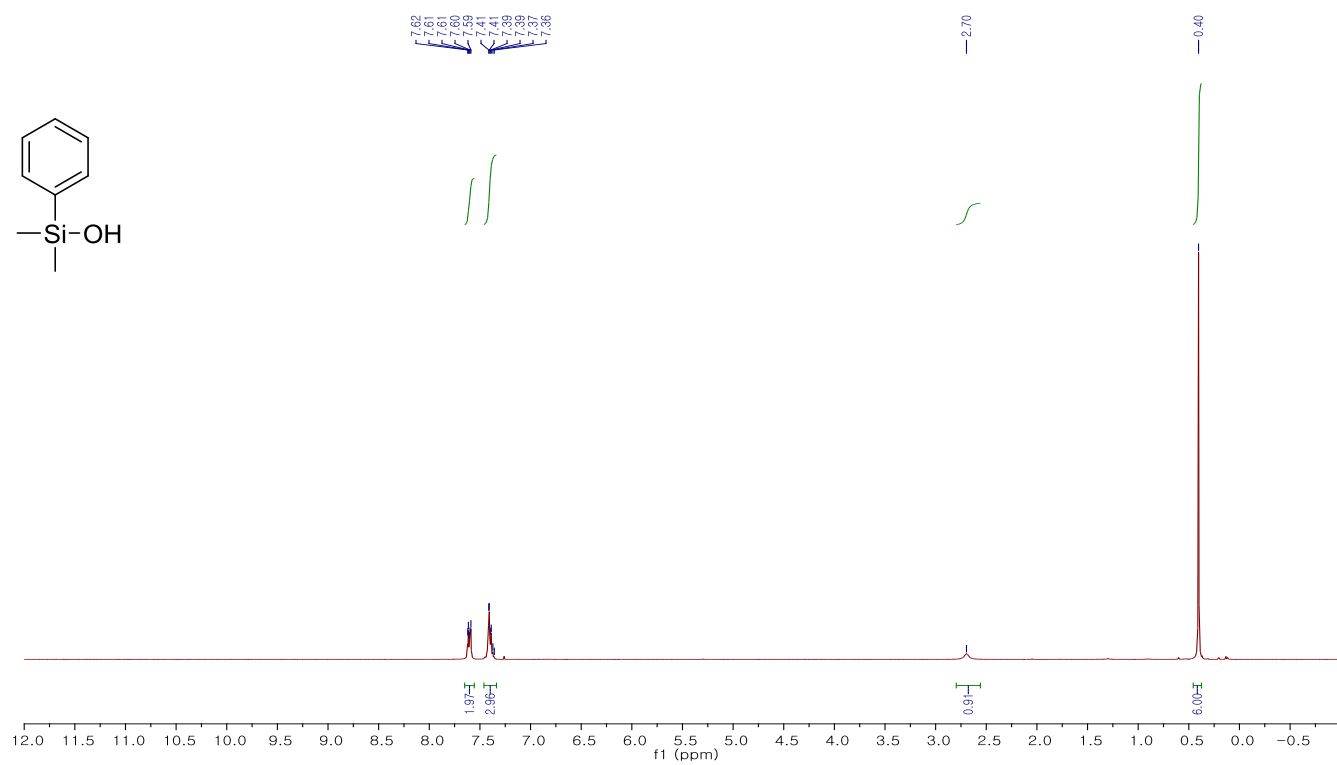

<sup>13</sup>C NMR (8c) (CDCl<sub>3</sub>)

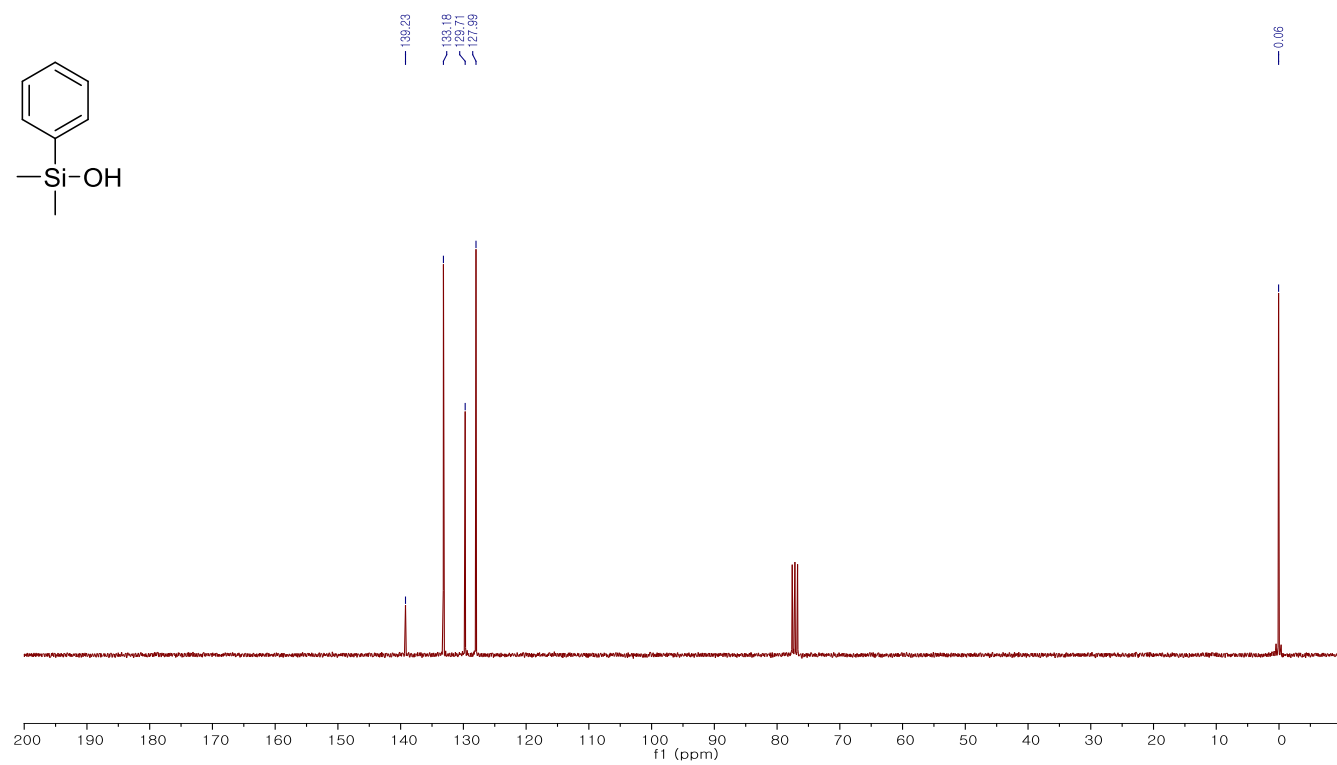

<sup>1</sup>H NMR (**8d**) (CDCl<sub>3</sub>)

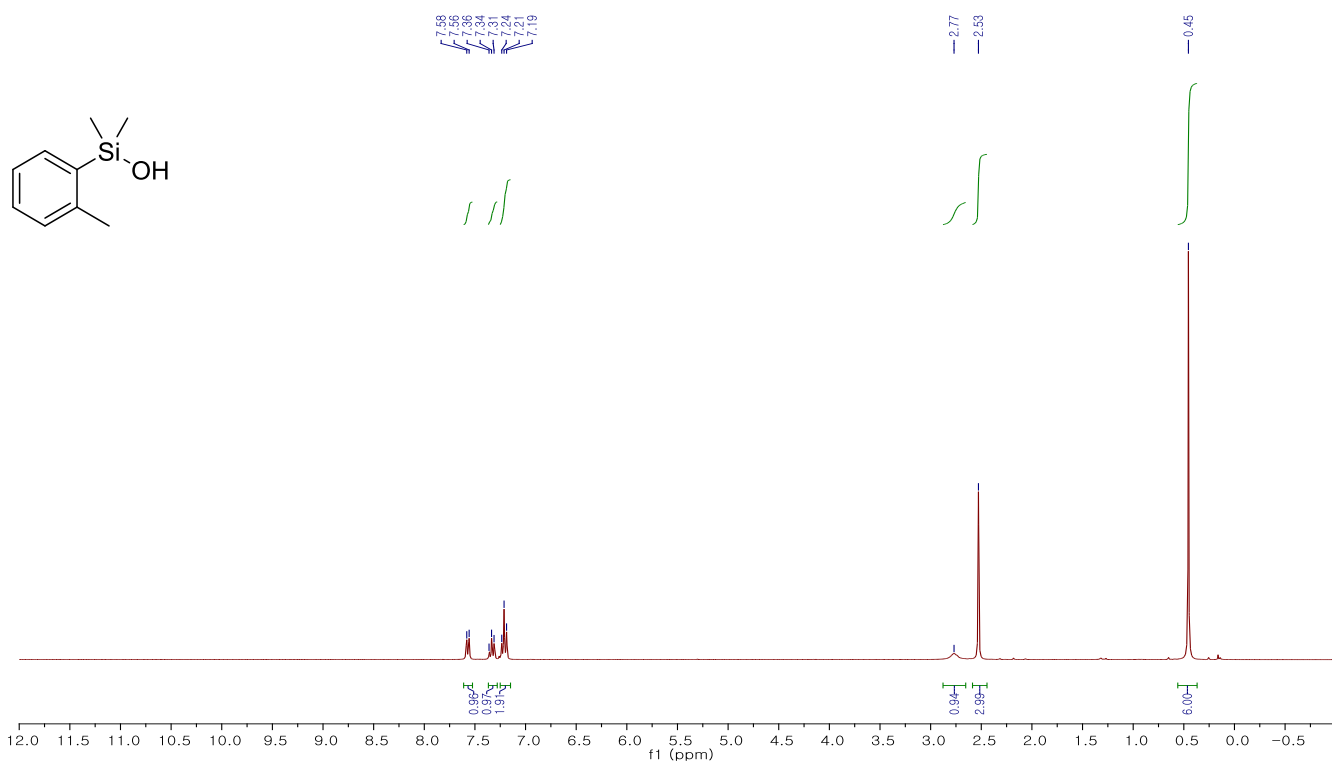

<sup>13</sup>C NMR (**8d**) (CDCl<sub>3</sub>)

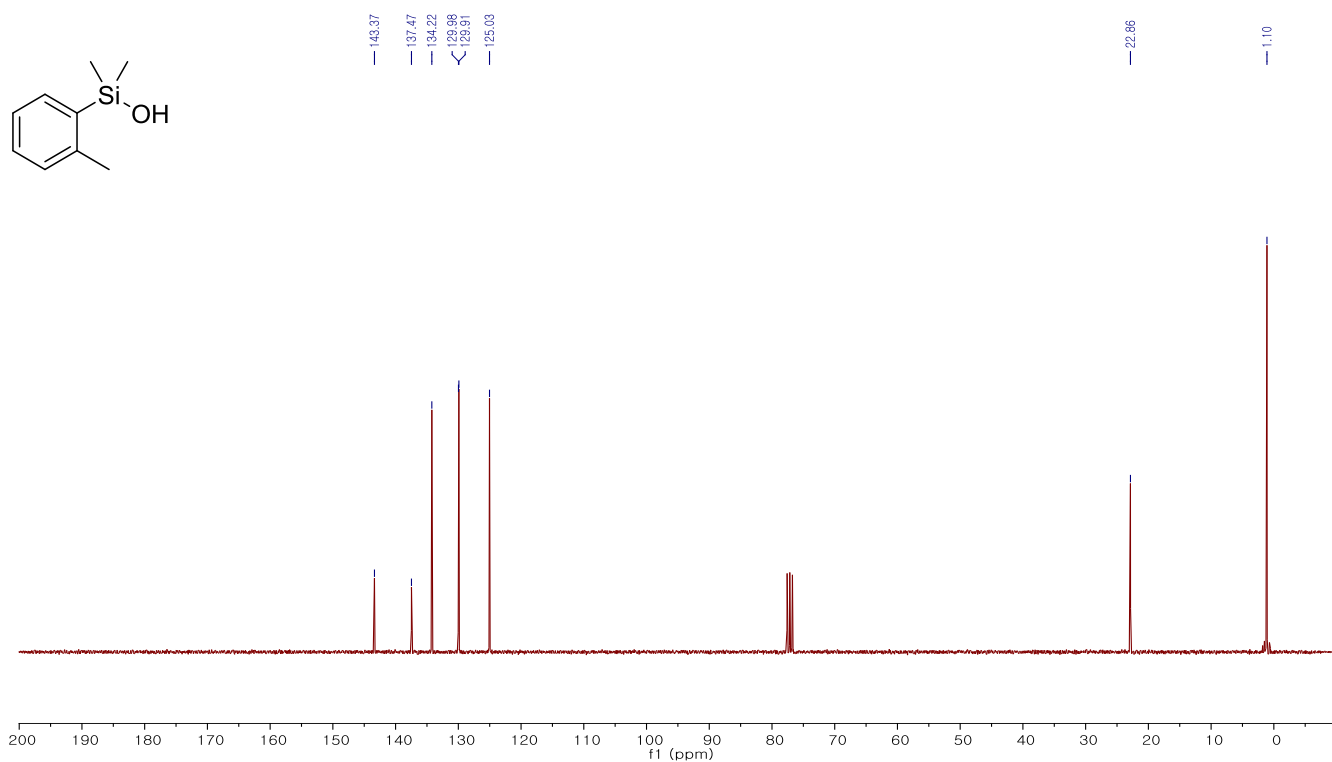

<sup>1</sup>H NMR (**8e**) (CDCl<sub>3</sub>)

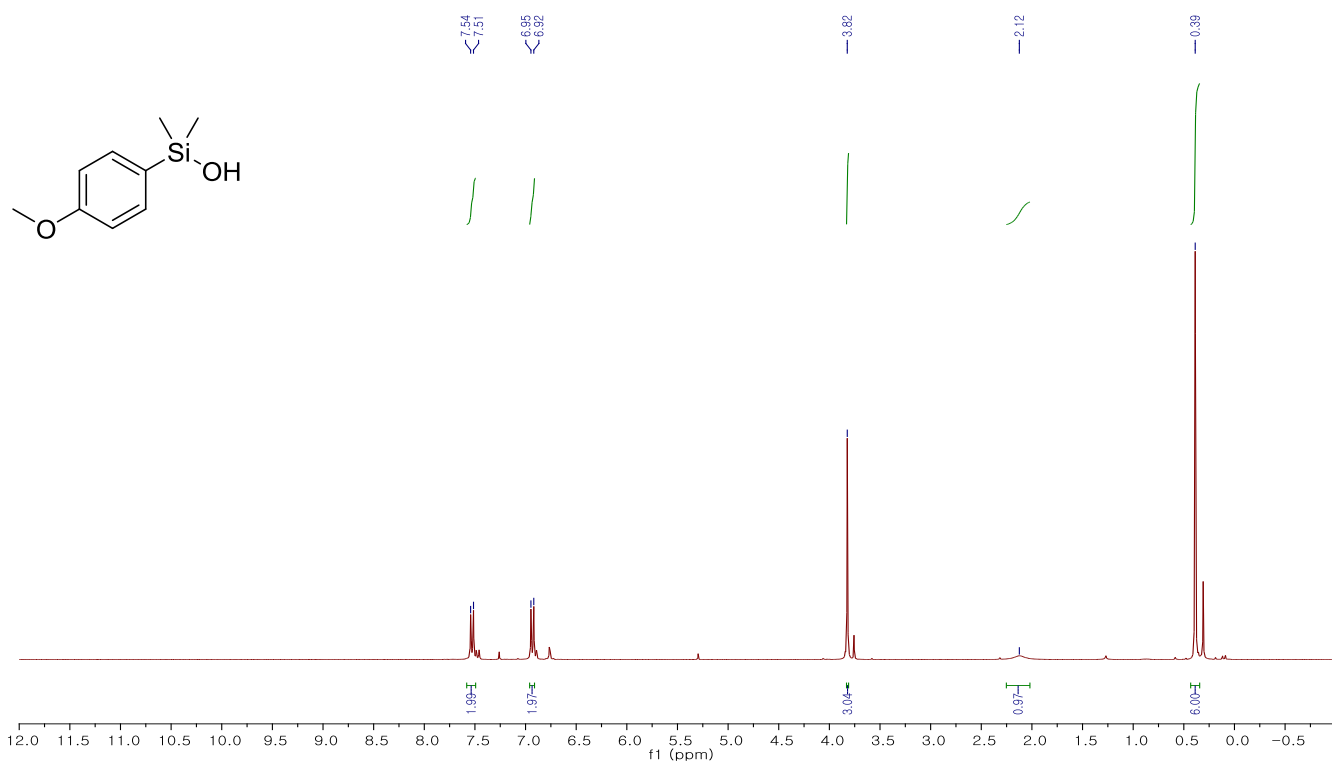

<sup>13</sup>C NMR (**8e**) (CDCl<sub>3</sub>)

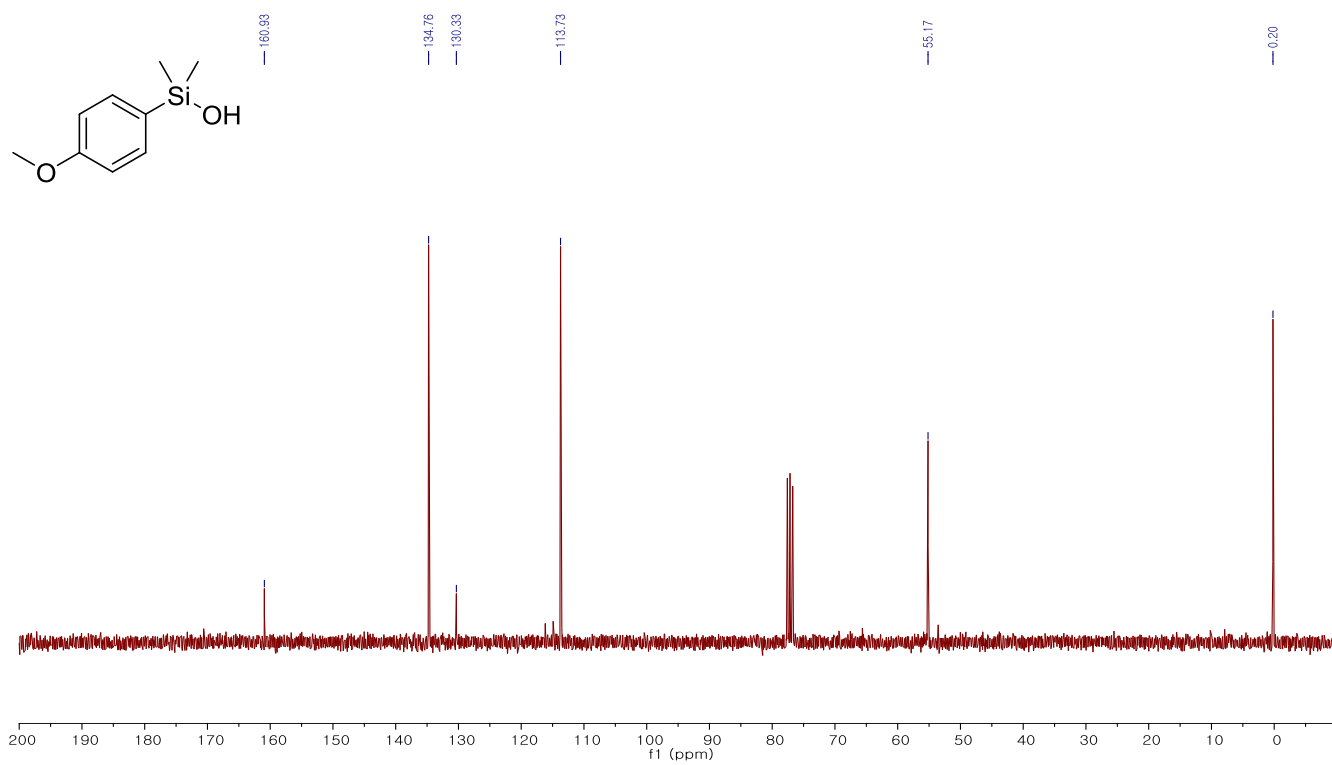

<sup>1</sup>H NMR (8f) (CDCl<sub>3</sub>)

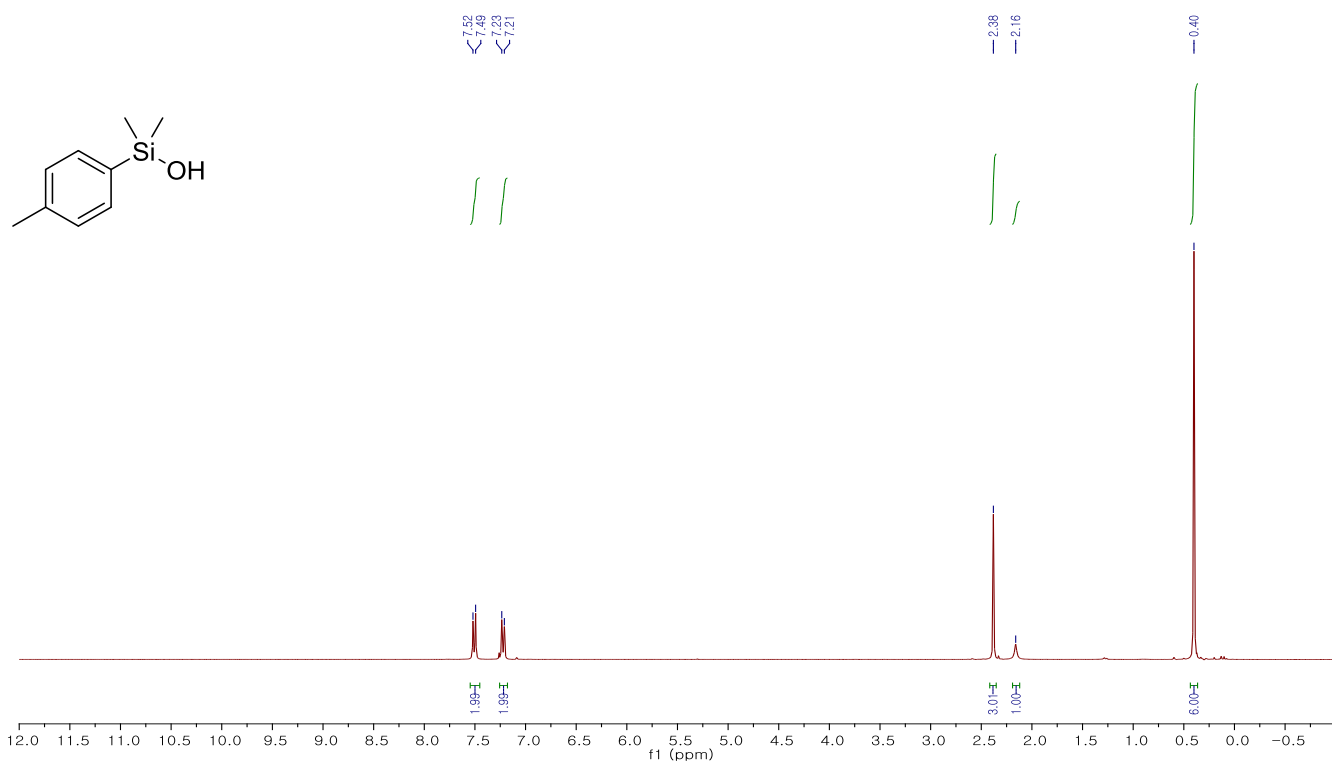

<sup>13</sup>C NMR (8f) (CDCl<sub>3</sub>)

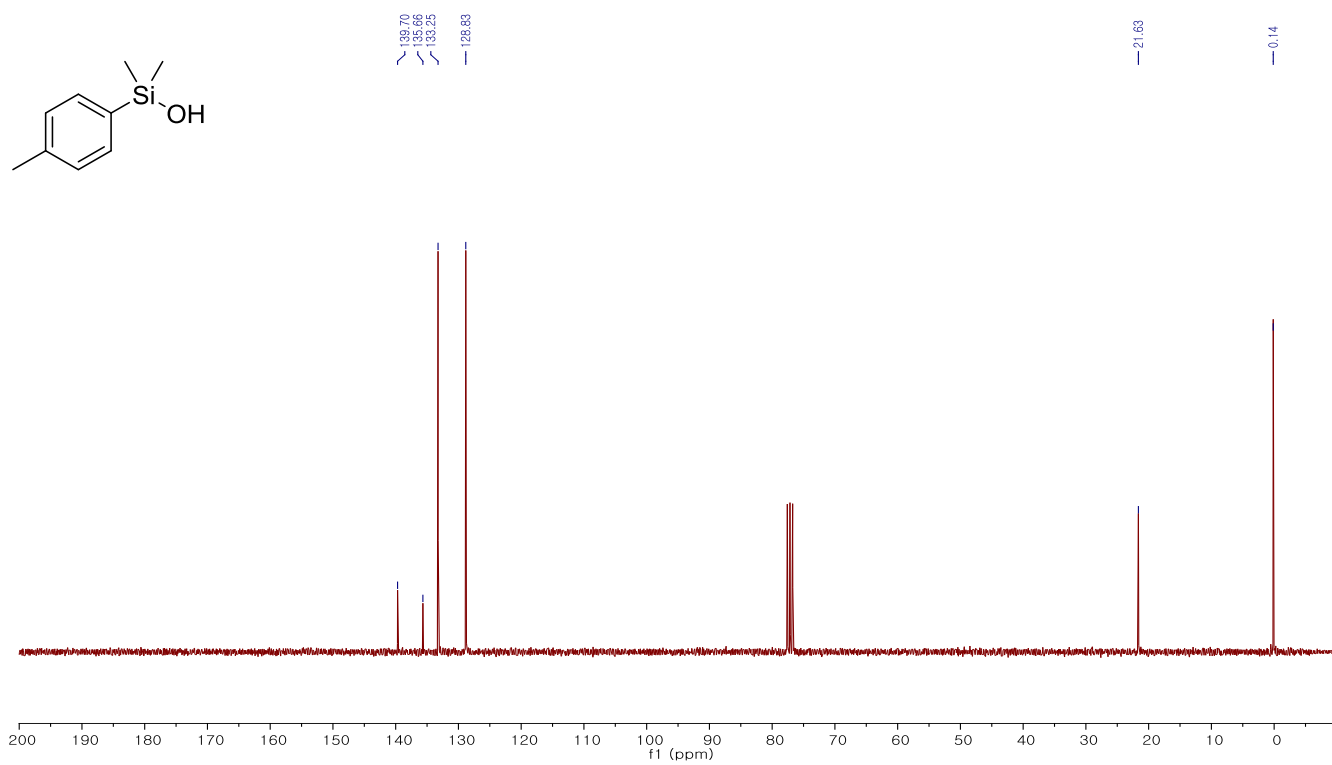



<sup>1</sup>H NMR (8g) (CDCl<sub>3</sub>)

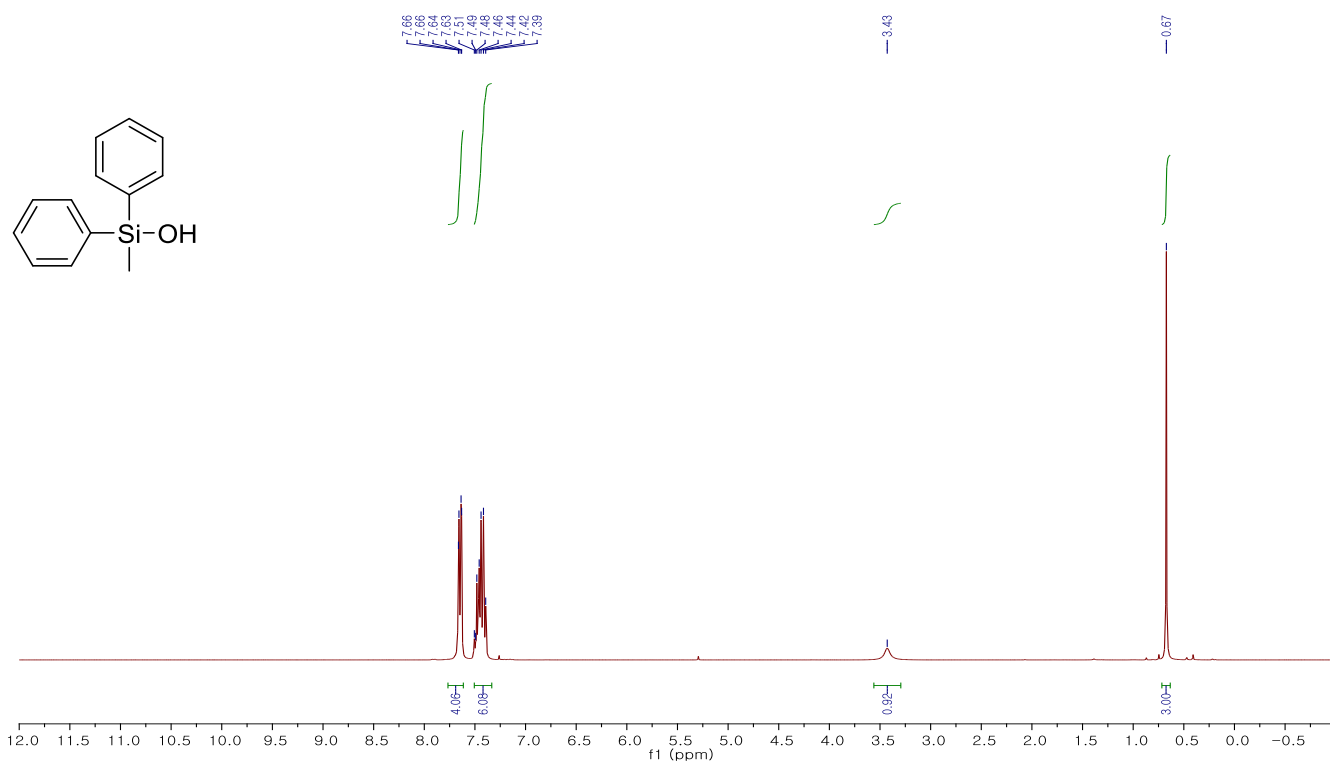

<sup>13</sup>C NMR (8g) (CDCl<sub>3</sub>)

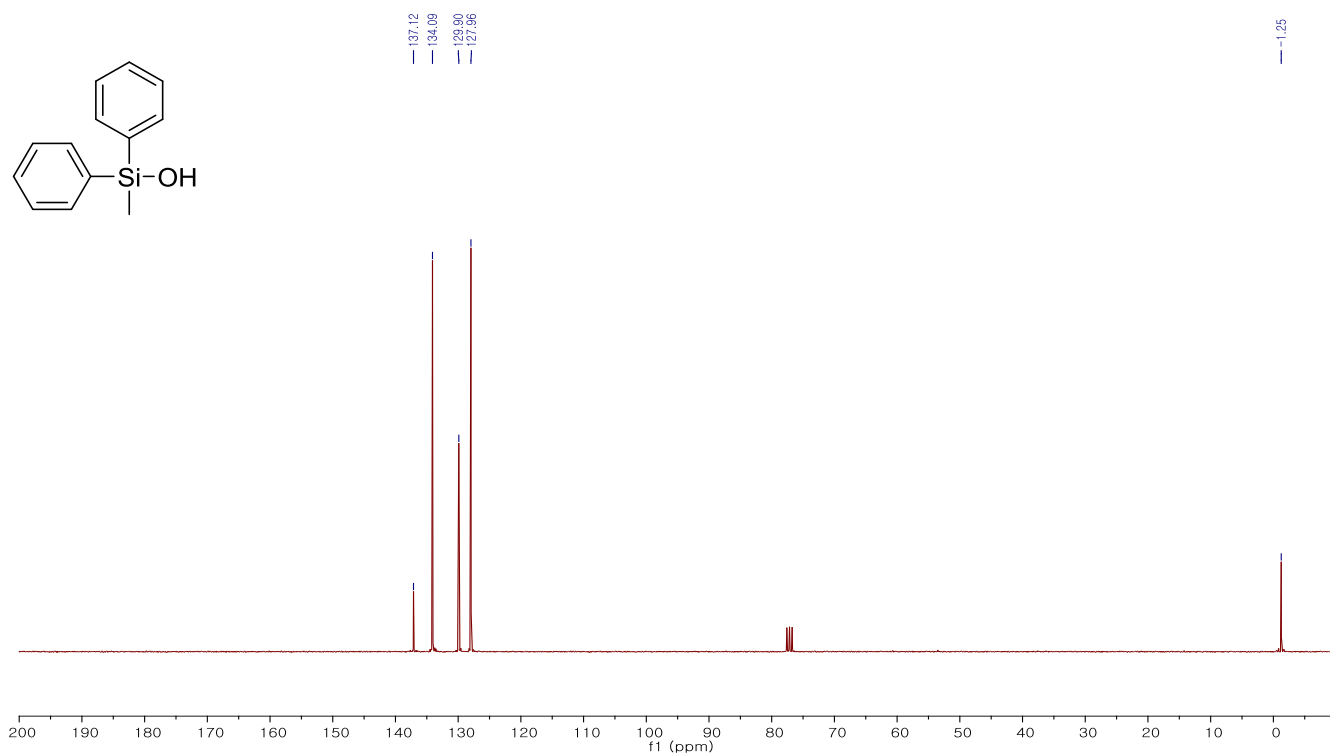

<sup>1</sup>H NMR (**8h**) (CDCl<sub>3</sub>)

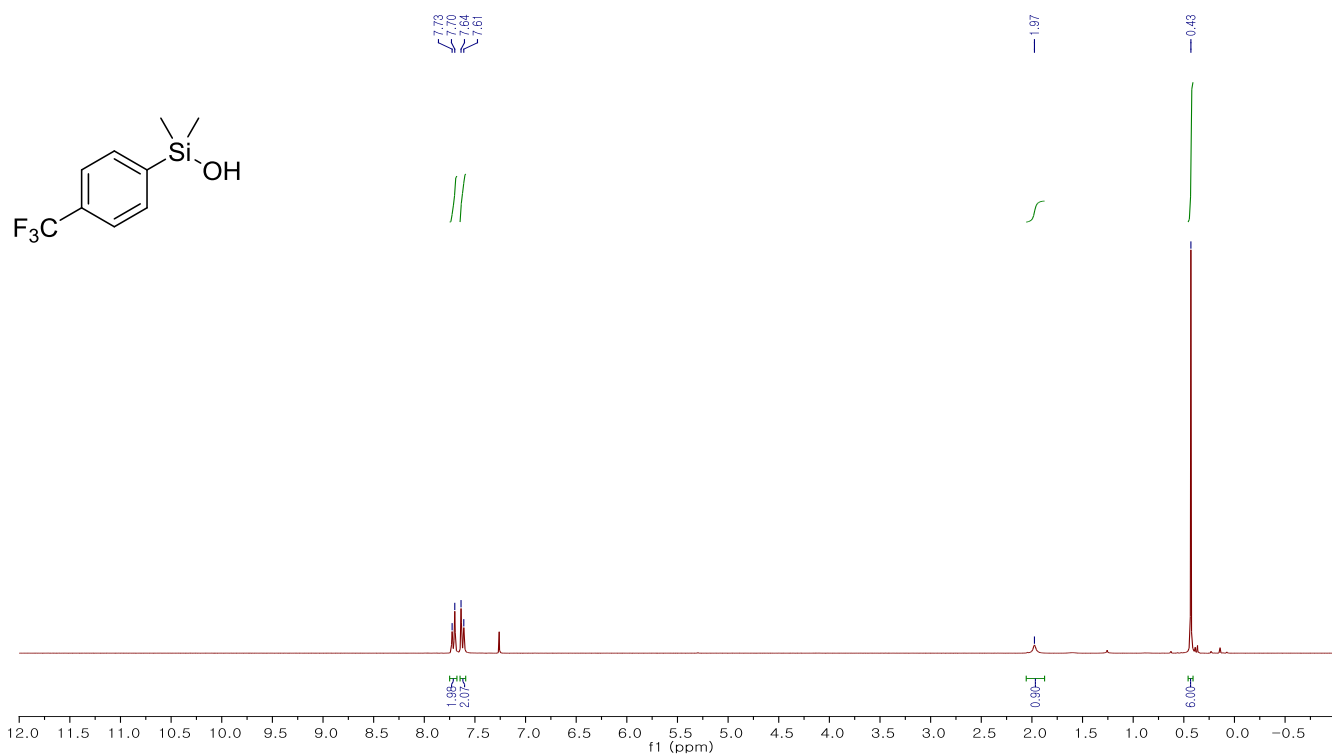

<sup>13</sup>C NMR (**8h**) (CDCl<sub>3</sub>)

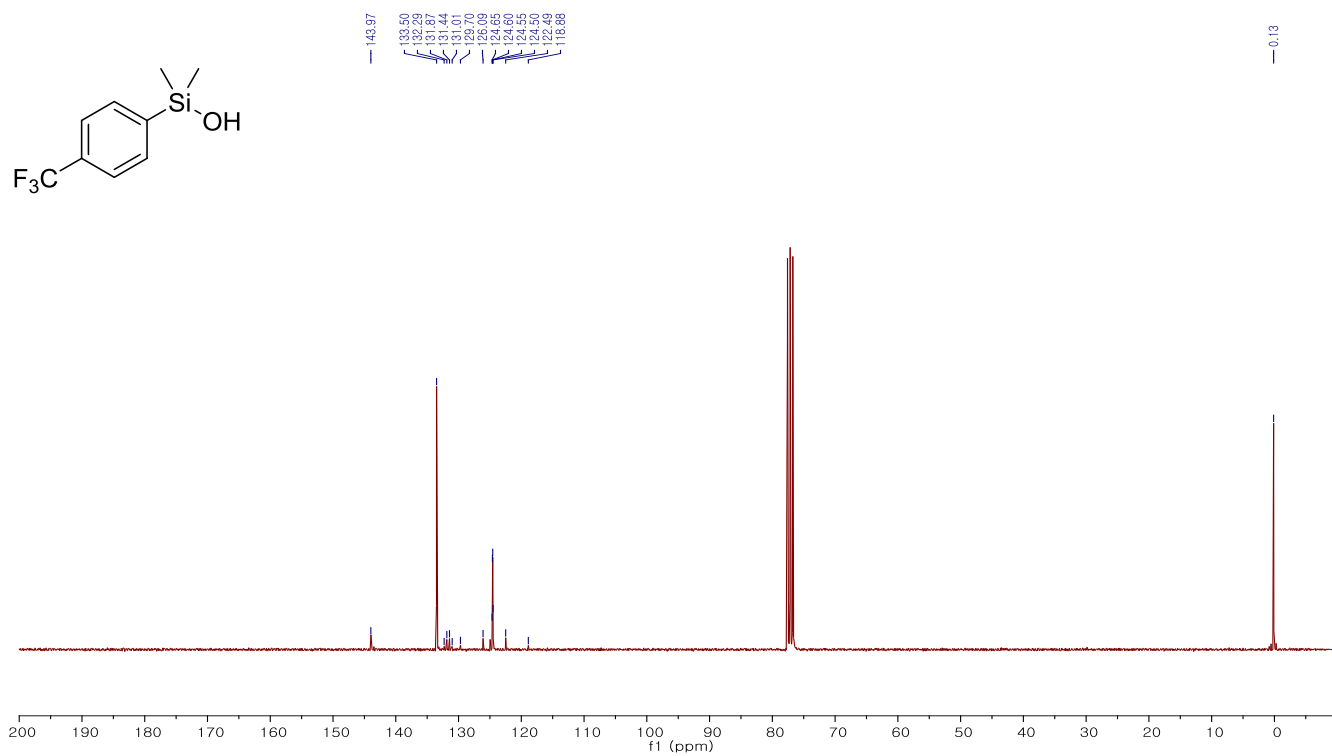

<sup>1</sup>H NMR (**8i**) (CDCl<sub>3</sub>)

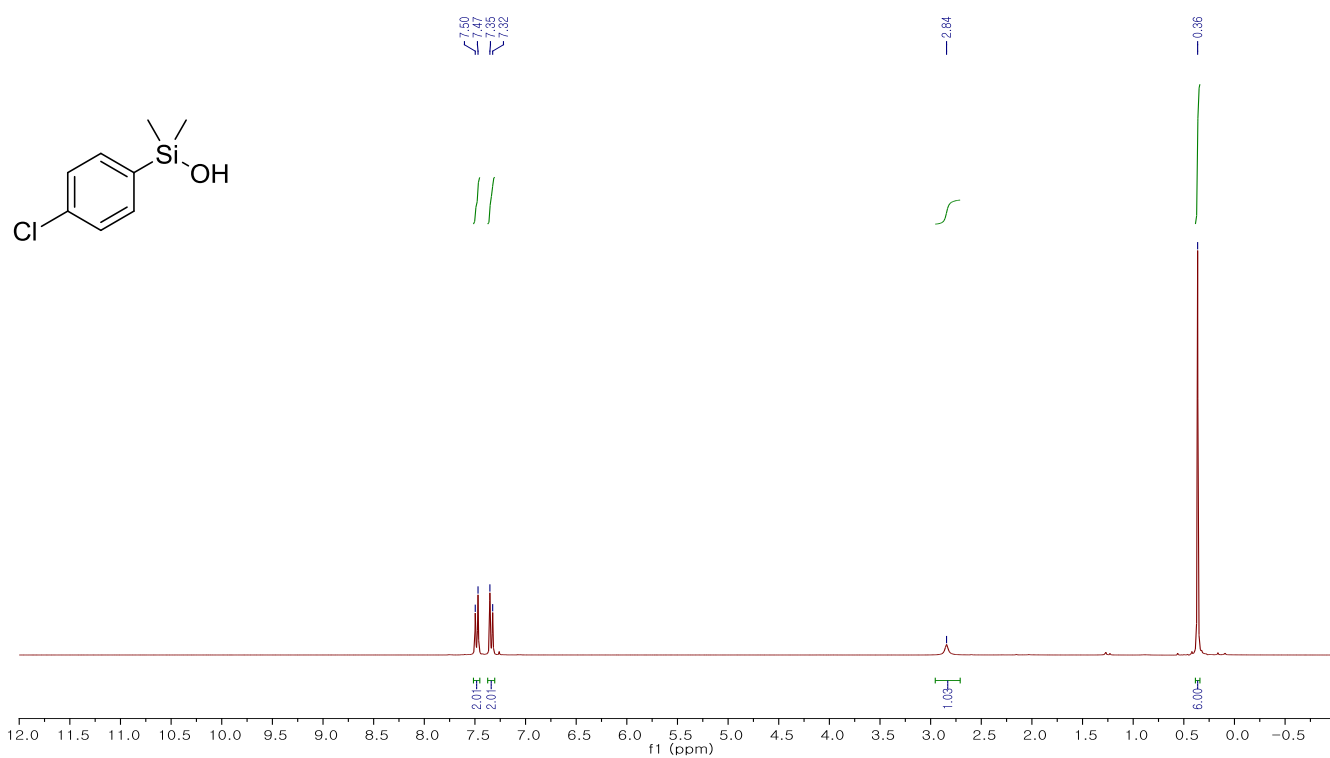

<sup>13</sup>C NMR (**8i**) (CDCl<sub>3</sub>)

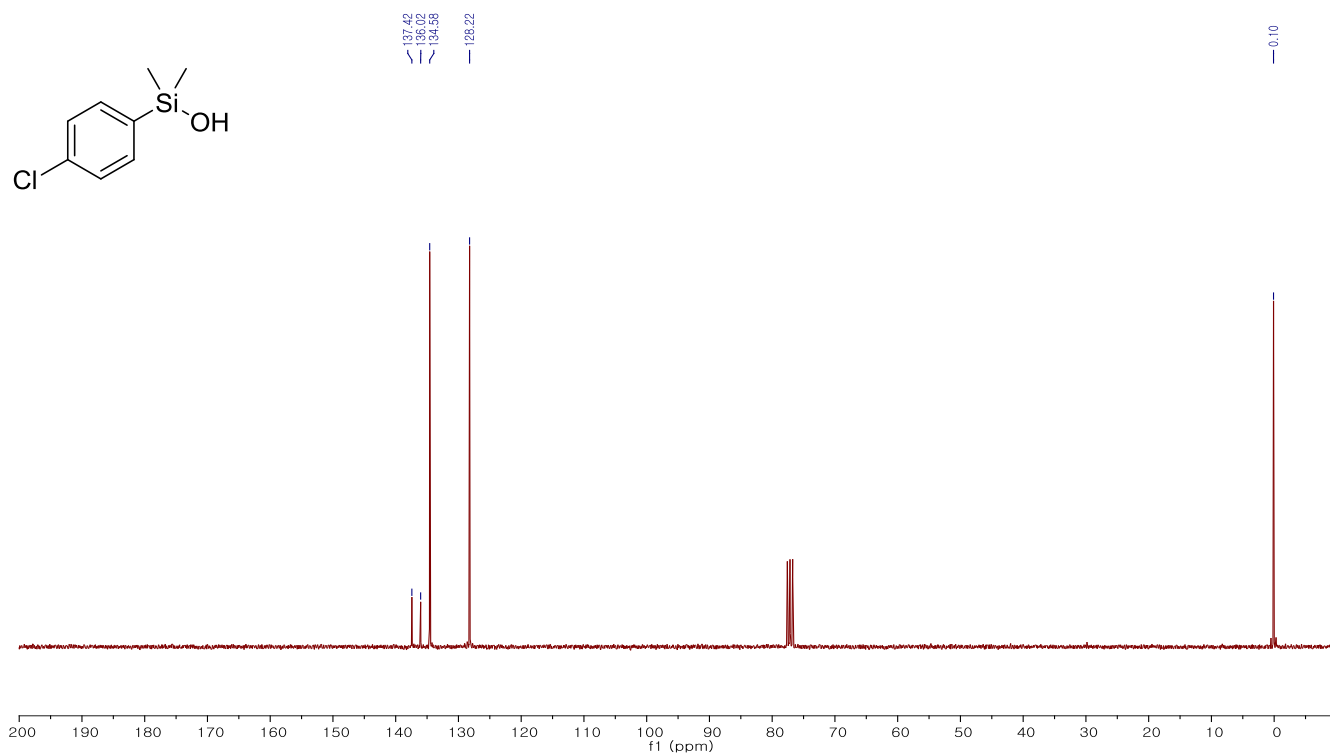

Supplement: c8cc02276c1.pdf [file c8cc02276c1.pdf]
